# Growth Hormone and Bone\*

CLAES OHLSSON, BENGT-ÅKE BENGTTSSON, OLLE G. P. ISAKSSON,  
TROELS T. ANDREASSEN, AND MARIA C. SLOOTWEG

Research Centre for Endocrinology and Metabolism (C.O., B-Å.B., O.I., M.S.), Sahlgrenska University Hospital, S-41345 Göteborg, Sweden; Diabetes Branch (C.O.), The National Institute of Diabetes and Digestive and Kidney Diseases, National Institutes of Health, Bethesda, Maryland; Department of Connective Tissue Biology (T.T.A.), Institute of Anatomy, University of Aarhus, Aarhus, Denmark; and Eli Lilly, Netherlands (M.S.), Nieuwegein, Netherlands

- I. Introduction
- II. Effects of GH on Longitudinal Bone Growth
  - A. GH and regulation of postnatal longitudinal bone growth
  - B. Results supporting an important physiological role of IGF-I for bone growth
  - C. Evaluation of the somatomedin theory *vs.* the dual effector theory
- III. Effect of GH *in Vitro*
  - A. Effects of GH in bone tissue cultures
  - B. Effects of GH on osteoblasts
  - C. Effects of GH on osteoclasts
- IV. Effects of GH on Bone Metabolism in Animals
  - A. Effects of GH deficiency and GH replacement on bone parameters
  - B. Effects of GH treatment on bone parameters of animals with normal GH secretion
  - C. Effects of GH on fracture healing
- V. Effects of GH on Bone Metabolism in Humans
  - A. Bone metabolism in patients with acromegaly and GH deficiency
  - B. Effects of the GH/IGF-I axis on bone metabolism and bone mass in patients with normal GH secretion
- VI. Summary and Conclusions

## I. Introduction

**G**H AFFECTS several tissues including liver, muscle, kidney, and bone. GH effects on muscle and kidney have recently been extensively reviewed in *Endocrine Reviews* by Florini *et al.* (1) and Feld and Hirschberg (2). Since GH has important effects on skeletal tissues, our focus in this article will be on our current understanding of GH effects on bone. A large increase in bone mass occurs during childhood and puberty via endochondral bone formation. A gradual increase in bone mass is then seen until peak bone mass is

reached at 20–30 yr of age. Subsequently, bone mass decreases with an accelerated bone loss seen in females after menopause. Bone remodeling is regulated by a balance between bone resorption and bone formation. In this process GH is known to play a role (3–7). A net gain of skeletal mass due to new bone formation caused by GH was first shown in adult mongrel dogs (8). After treatment with GH for 3 months a 2% increase in cortical bone mass, as assessed by histomorphometry, was found.

Due to limitations in the supply of GH, a limited number of animal and clinical studies were performed until the mid-1980s when recombinant human GH became available. The initial use of recombinant human GH was restricted to treatment of growth-retarded GH-deficient (GHD) children. However, it is now well established that GH also exerts important effects in adults, and GH treatment of GHD adults is now approved in several countries. Recent studies, in both animals and humans, have demonstrated that GH exerts potent effects on bone remodeling.

In this article we will discuss the role of GH in the process of bone growth until peak bone mass is achieved and present evidence that an increased endogenous production of GH or treatment with GH might increase bone mass in adults. Recent studies of the cellular mechanism of action for GH in the regulation of bone growth are given in *Section II*. It is proposed that GH stimulates longitudinal bone growth directly by stimulating prechondrocytes in the growth plate followed by a clonal expansion caused both by the GH-induced local production of insulin-like growth factor I (IGF-I) and by a GH-induced increase in circulating levels of IGF-I. However, the main purpose of this article is to present recent data indicating that GH is important in the regulation of bone remodeling. Finally we will present a hypothetical model for the mechanism of action of GH in the regulation of bone remodeling and bone mass.

## II. Effects of GH on Longitudinal Bone Growth

### A. GH and regulation of postnatal longitudinal bone growth

During the process of longitudinal bone growth, prechondrocytes in the germinal cell layer differentiate and thereafter undergo limited clonal expansion in individual chondrocyte columns in the growth plate. Subsequently, cells in the hy-

Address reprint requests to: Claes Ohlsson M.D, Ph.D., Department of Internal Medicine, Division of Endocrinology, Sahlgrenska Hospital, S-41345 Göteborg, Sweden. E-mail Claes@SS.GU.SE

\* This work was supported by grants from the Swedish Medical Research Council (Grants K95–19P-11328–01A and K96–19P-11837–01A), and a grant to Maria Słotweg (K96–14VK-11937–01A), as well as grants from Pharmacia-Upjohn (Stockholm, Sweden), Novo Nordisk (Bagsvaerd, Denmark), the Göteborg Medical Society, and the Lundberg Foundation.

peritrophic zone mature and degenerate and are eventually incorporated into bone (9–12).

Several hormones are important for normal postnatal longitudinal bone growth, but it is generally accepted that GH is the most important hormone in this respect. Furthermore, it has been demonstrated that GH stimulates growth of cartilage and other tissues by increasing the number of cells rather than by increasing cell size (11–14). A widely discussed question during the last two decades has been whether GH acts on tissues directly, or whether the effect is mediated by a liver-derived growth factor, initially called sulfation factor, but later renamed somatomedin, and subsequently shown to be identical to IGF-I. According to the original somatomedin hypothesis, GH stimulates skeletal growth by stimulating liver production of somatomedin which, in turn, stimulates longitudinal bone growth in an endocrine manner (15–17).

In the early 1980s the somatomedin hypothesis was challenged by a study demonstrating that injection of GH directly into the rat tibia growth plate stimulated longitudinal bone growth at the site of injection (18). This initial observation has subsequently been confirmed and extended, and it is now well documented that GH stimulates growth of many different tissues directly (19–34).

By studying the effects of GH and IGF-I in 3T3 preadipocytes, Green and co-workers (35, 36) made the observation that GH and IGF-I act on cells at different stages of matu-

ration. Thus, GH was found to stimulate young preadipocytes, whereas IGF-I stimulated cells at a later stage of development. The hypothesis by Green and co-workers (35), that GH acts on progenitor cells and that IGF-I stimulates the subsequent clonal expansion, was named the “dual effector theory.” The finding that GH stimulates longitudinal bone growth directly (18) and increases the local production of IGF-I by stimulating transcription of the IGF-I gene (37) led to the proposal that the dual effector theory of GH action is valid for the regulation of longitudinal bone growth as well (10). Subsequent *in vitro* studies using cultured epiphyseal chondrocytes in suspension revealed that GH and IGF-I stimulate cells at different stages of maturation. Thus, GH stimulates the colony formation of young prechondrocytes, whereas IGF-I stimulates cells at a later stage of maturation, giving support to the hypothesis that cell maturation is indeed an important factor determining responsiveness of epiphyseal chondrocytes to GH and IGF-I (38–42). The hypothesis that GH preferentially acts on chondrocyte progenitor cells *in vivo* is directly supported by another study from our laboratory. By labeling slowly cycling prechondrocytes with radioactive thymidine and studying the subsequent labeling pattern in sagittal sections of the tibia growth plate by means of autoradiography, the observation was made that local injection of GH increased the number of labeled cells in the prechondrocyte layer of the growth plate. In contrast, IGF-I did not stimulate incorporation of radioactive thymi-

FIG. 1. The authors' proposed mechanism of action for GH and IGF-I in stimulating longitudinal bone growth. The different zones of the rat tibial growth plate are indicated. GH stimulates longitudinal bone growth directly by stimulating prechondrocytes in the growth plate followed by a clonal expansion caused both by the GH-induced local production of IGF-I, and by a GH-induced increase in circulating levels of IGF-I. GH is the major determinant for the stimulation of progenitor cells although it is possible that IGF-I might stimulate progenitor cells to some extent.

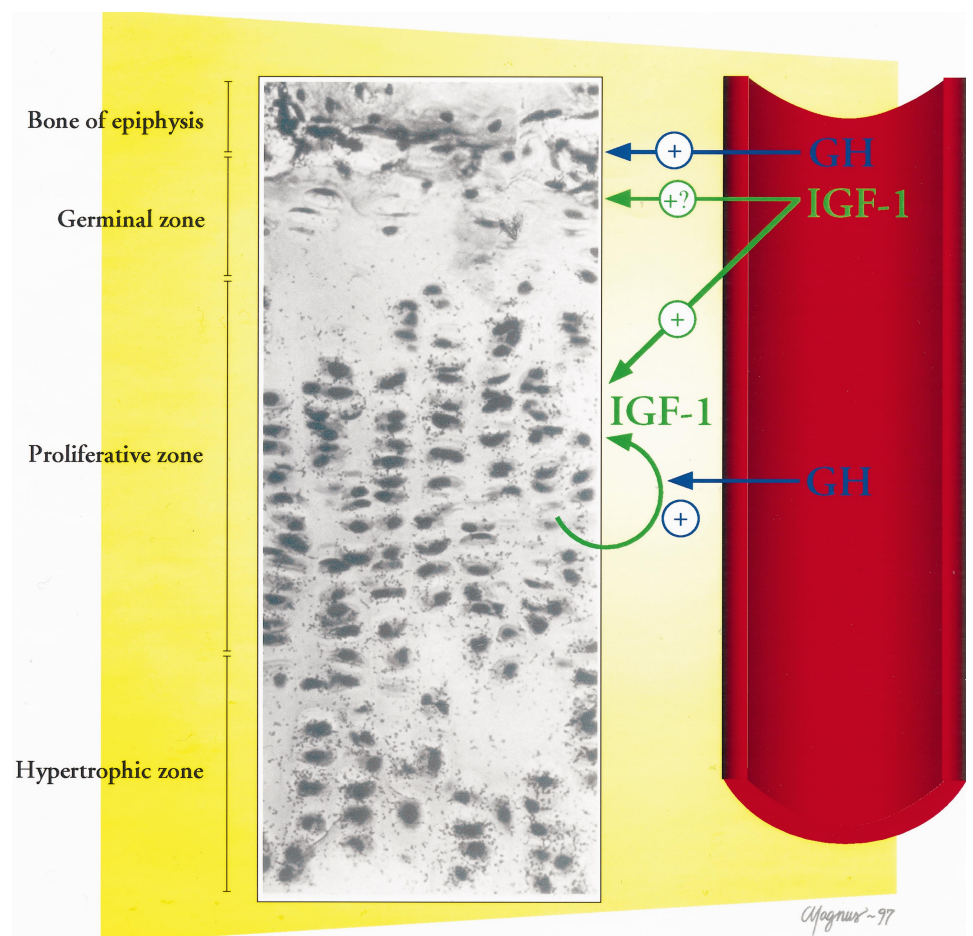

dine in cells in the same layer (43). Using a histomorphometric technique, it was found that GH as well as IGF-I has the capacity to stimulate prechondrocytes, as both GH and IGF-I reduced the cell cycle time of prechondrocytes. However, it was found in the same study that growth plate prechondrocytes from GH-treated animals had a 50% shorter cell cycle time compared with IGF-I-treated animals (44). These data indicate that at least some of the growth-promoting effect of GH is exerted via direct stimulation of prechondrocytes.

### B. Results supporting an important physiological role of IGF-I for bone growth

Studies performed during the last 20 yr involving systemic administration of IGF-I to GH-deficient animals and man suggest that both IGF-I and GH have the capacity to stimulate longitudinal bone growth *in vivo* (45–54). Elimination of IGF-I and the IGF-I receptor by homologous gene recombination have demonstrated that the IGF-I-signaling pathway is very important for tissue development and growth. Thus, mice with IGF-I deficiency show severe retardation of statural growth that first becomes apparent at day 12 in embryonic life, and subsequent postnatal growth is severely retarded (55–58). IGF-I receptor “knock-out” mice are affected more profoundly and die of respiratory failure early postnatally due to poor development of respiratory muscles (57). Furthermore, a patient with a deletion of the IGF-I gene demonstrated intrauterine growth retardation and postnatal growth failure (59). These experimental studies and the clinical observation clearly demonstrate that a normal expression of IGF-I, as well as its receptor, plays a critical role for normal growth and tissue development. However, these experiments are unable to answer the question of whether locally produced (autocrine/paracrine acting) IGF-I is more important for normal tissue growth and development than circulating (endocrine acting) IGF-I.

Several studies have shown that systemic administration of recombinant IGF-I stimulates longitudinal bone growth as well as body weight gain in hypophysectomized rats, giving support to the theory that IGF-I has endocrine actions on statural growth. Interestingly, administration of IGF-I particularly promoted the growth of nonskeletal tissues. Thus, the effect of IGF-I on kidney, spleen, and thymus growth was larger in magnitude compared with other tissues (46, 47, 60). The quantitative difference in tissue response to IGF-I has also been found in transgenic mice overexpressing IGF-I, suggesting that IGF-I has particularly important functions in nonskeletal tissues (61, 62). These data demonstrate that systemic delivery of IGF-I has the capacity to increase growth in animals.

### C. Evaluation of the somatomedin theory vs. the dual effector theory

The fact that both GH and IGF-I stimulate tissue growth makes an analysis of the relative importance of the peptides for this effect, in terms of spatial and temporal patterns, quite complex. It seems justified to critically analyze available exper-

imental and clinical data and find out how available data fit into the two different theories, the somatomedin theory and the dual effector theory. The effect of systemic administration of GH and IGF-I to hypophysectomized rats has shown that GH and IGF-I have independent and differential functions (45, 46, 63). When the two compounds are given together, they exert additive or synergistic effects (45, 60, 64). Also, administration of GH to animals treated with maximal doses of IGF-I stimulates growth further (63). Furthermore, the differences between GH and IGF-I are quite obvious in transgenic animals overexpressing either GH or IGF-I. Thus, GH-transgenic animals grow to approximately twice the size of their normal littermates (62, 65). In contrast, mice generated from a cross of mice overexpressing IGF-I and mice lacking GH-expressing cells demonstrate an increase in longitudinal bone growth and body weight when compared with their GH-deficient controls. However, IGF-I transgenic mice do not grow more than their nontransgenic siblings (61, 66), demonstrating that overexpression of GH, but not IGF-I, causes supranormal growth. Local administration of GH, but not IGF-I, stimulates the local production of IGF-I by stimulating the transcription of the IGF-I gene (22, 37), giving direct experimental support to the notion that there is an interplay between GH and IGF-I. Administration of antibodies to IGF-I abolishes the stimulatory effect of locally administered GH (31), supporting the theory that the locally produced IGF-I has an important functional role in the expression of the effect of GH at the site of the local tissue level (10, 67).

Treatment of GH insensitivity syndrome (GHIS) patients with recombinant IGF-I has shown that IGF-I is quite effective in stimulating statural growth for 1–2 yr (49–51, 53, 54, 68–72), supporting the somatomedin theory. However, available clinical data suggest that the effect of IGF-I subsequently becomes less effective, perhaps due to a decreased rate of stimulation of prechondrocytes, a lack of GH-induced IGF-binding protein 3 (IGFBP-3) and/or a suboptimal IGF-I administration. However, from these clinical studies it is difficult to make a general conclusion whether IGF-I stimulates tissue growth by endocrine or autocrine/paracrine mechanisms under physiological circumstances in the intact organism. The question whether autocrine/paracrine or endocrine IGF-I is the more important factor for the stimulation of tissue growth will probably not be solved until tissue growth can be studied in transgenic animals with tissue-specific gene deletions of IGF-I or the IGF-I receptor.

Taken together, available data suggest that GH stimulates longitudinal bone growth directly by stimulating prechondrocytes in the growth plate followed by a clonal expansion caused both by the GH-induced local production of IGF-I, and by a GH-induced increase in circulating levels of IGF-I. GH is the major determinant for the stimulation of progenitor cells, although it is possible that IGF-I might stimulate progenitor cells to some extent (Fig. 1).

## III. Effect of GH *in Vitro*

### A. Effects of GH in bone tissue cultures

Several *in vitro* models, developed to study the effects of hormones and growth factors on bone remodeling, have been presented, and some of these will be discussed in this



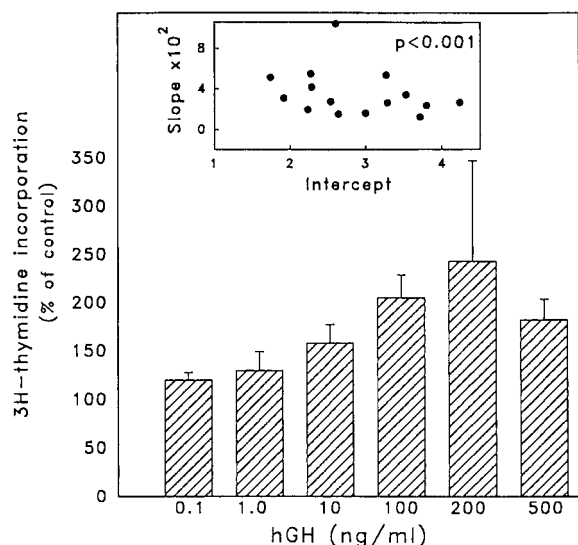

FIG. 2. Effects of GH on [<sup>3</sup>H]thymidine incorporation in DNA of human osteoblast-like cells. Data are shown as mean  $\pm$  SEM ( $n = 15$ ). Absolute value of the control cultures is 1950 dpm/ml. To illustrate the statistical method used to analyze dose-response relationship, an inset is included in this figure. For each cell strain tested, the log dose-response relationship was described by a regression line. Inset shows the slopes obtained in the 15 independent cell strains studied plotted against their intercepts. Variations in slopes (along the y-axis) represent differences in responsiveness to GH among various cell strains. In hypothetical testing these slopes were tested for their deviation from zero by Student's paired  $t$  test. [Reproduced with permission from M. Kassem *et al.*: *Calcif Tissue Int* 52:222–226, 1993 (24).]

section. They include different types of tissue cultures, osteoblastic cell lines, and primary cells. Bone tissue cultures offer the advantage of preserved intercellular interactions, thus presenting a more *in vivo*-like experiment compared with isolated cell systems. In 1984 Stracke *et al.* (33) reported that GH increased alkaline phosphatase (AP) activity in the culture medium from embryonal rat tibias in tissue culture. Furthermore, IGF-I was increased in the culture medium after addition of GH to cultured tibias, indicating that GH stimulated IGF-I production in the bone specimen. These observations were later confirmed and extended by studies of Maor *et al.* (26, 27). Pieces of cartilage isolated from the rat mandibula were cultured on the top of collagen sponges in the absence or presence of GH. Three-day incubation with GH caused a marked increase in DNA synthesis and in the size of the cartilage specimen. The effect of GH was even more pronounced after 6 days in culture, at which time a distinct network of trabeculae was noted throughout the extracellular matrix. The trabeculae contained osteocyte-like cells and were in close contact with both osteoblast-like and osteoclast-like cells. Positive staining with antibodies against bone-specific antigens, *i.e.*, osteocalcin and osteopontin, provided further support for the notion that the newly formed trabecular formation was comprised of bone matrix components. Untreated control cultures lacked bone-like structures, demonstrating that GH directly induced bone formation *in vitro* (27).

### B. Effects of GH on osteoblasts

1. *GH directly stimulates osteoblasts.* The effect of GH has been studied in a number of osteoblastic cell lines and primary isolated cells of various origin, including human, chicken, rat, and mouse primary cells, and the SaOS-2 human and UMR 106.01 rat osteosarcoma cell line. GH induces proliferation of primary isolated rat (21, 73), mouse (74), chicken (32), human (24, 75–78), and rat osteosarcoma cells (19, 79), as well as cells from a rat osteoblast-like cell line (80) and human osteosarcoma cells (75, 81) (Fig. 2). The effective concentrations of GH are in the physiological range (half-maximal stimulation at 10–50 ng/ml), suggesting that GH exerts direct actions on osteoblasts. Not only does GH stimulate the proliferation of osteoblasts, but, in some studies, it also stimulates differentiated functions of these cells. Thus, typical phenotypic functions of osteoblasts such as AP, osteocalcin, and type I collagen are stimulated by GH (4, 21, 24, 74, 80, 82). For osteoblasts it is difficult to find a good model system for the identification of the actual target cell of GH action. However, bone marrow-derived precursors of human bone cells are responsive to GH (76, 77), suggesting, in analogy to the actions of GH in early progenitor cells in adipose tissue and cartilage, that GH interacts with progenitor cells.

2. *The role of IGF-I for GH action in osteoblasts.* IGFs exert anabolic effects on osteoblasts. IGF-II is expressed in both rodent and human osteoblasts (83–86). IGF-I is produced by rodent (87–90) osteoblasts while contradictory results have been presented for human osteoblasts. Chenu and co-workers (82), but not Kassem *et al.* (24), were able to detect significant amounts of IGF-I in the culture medium from human osteoblast-like (hOB) cells. Studies both detecting (85, 86, 91) and not detecting (92) IGF-I mRNA transcripts in human osteoblasts have been presented. Furthermore, an *in situ* hybridization study demonstrated that osteoblasts in adult human osteophyte tissue express the IGF-I mRNA transcript (93).

Whereas circulating levels of IGF-I are GH dependent, GH may not be the chief determinant of local IGF-I production in bone. Thus, *in vitro* regulatory effects of estrogen, PTH, and cortisol, as well as a variety of local growth factors, on IGF I production have been demonstrated (86, 88, 94–102). The regulation of local IGF-I by growth factors and hormones is of potential clinical importance, but in this article only GH-modulated effects in bone are discussed. A stimulation of osteoblastic IGF production by GH has been demonstrated by some authors (80, 82) but not by others (24, 83). To examine the importance of IGF-I as a mediator of GH action, endogenous IGF-I was sequestered by an antiserum to IGF in bone cell cultures. As a result, the proliferative action of GH was abolished (21), indicating that local IGF-I is important for GH-induced cell proliferation. In another study, by Scheven *et al.* (75), it was demonstrated that GH induced osteosarcoma growth but not growth of human osteoblast-like cells when the cells were cultured in the presence of IGF-I antibodies. In summary, GH induces IGF-I expression in rodent osteoblasts, while the induction of IGF-I by GH in human osteoblasts is uncertain.

The bioactivity of IGFs in bone tissue is modulated by several IGFBPs, mainly IGFBP-3, -4, and -5 (103). Therefore,

some of the GH effect may be mediated via a regulation of the local production of IGFBPs in osteoblasts. It is well known that GH treatment increases serum levels of IGFBP-3 (104–109), and the complex of IGF-I and IGFBP-3 is more effective in stimulating cortical thickness in ovariectomized (OVX) rats than IGF-I alone (110). IGFBP-3 is produced by osteoblasts. GH increases IGFBP-3 production in rat cells (73, 96, 111, 112), while no effect of GH is seen on IGFBP-3 expression in human cells (24, 83, 113). IGFBP-4 was originally isolated from bone as the inhibitory IGFBP (114), while IGFBP-5 is regarded as a stimulatory IGFBP for osteoblastic proliferation (115–117). In rat, as well as in human osteoblasts, it was found that GH decreases IGFBP-4, as determined by ligand blotting (113, 118), while no effect of GH was seen on IGFBP-4 protease activity in human osteoblast-like cells (119). In primary rat osteoblasts, IGFBP-5 mRNA levels were increased 2-fold after GH treatment (96). Interestingly, a recent clinical study has demonstrated that GH treatment increases serum levels of IGFBP-5 in GHD children (109). Whether this effect of GH is a direct effect on osteoblastic IGFBP-5 production remains to be shown. In conclusion, there are some indications of a GH-induced regulation of IGFBPs that potentially might have a regulatory role in bone metabolism.

Many functions of GH can be exerted without prior synthesis of IGFs. Thus, the expression of the protooncogenes *c-fos*, *c-jun*, *jun B*, and *c-myc* are expressed in the presence of protein synthesis inhibitors (120). Recently, using human osteoblast-like cells, Melhus and Ljunghall (121) demonstrated that different sets of genes were induced by IGF in some cases and GH in others, indicating that these factors have separate actions. In conclusion, it appears that some of the effects of GH on osteoblasts are mediated by IGFs, but others are not.

**3. Regulation of GH receptor (GHR) expression.** Barnard and colleagues (19) were the first to show specific high-affinity GHRs on osteoblast-like cells (UMR 106.06 cells). The presence of these receptors has been confirmed in primary isolated cultured human (78) and mouse (122) osteoblasts. Serum decreases the number of GHRs (79). In a search for the factors in serum responsible for this reduction in GHR expression, it was found that IGF-I and -II decrease the number of GHR in a dose- and time-dependent manner (123). This decrease was accompanied by a decrease in the levels of mRNA encoding the GHR. Similarly, the action of GH on osteoblastic proliferation was decreased after preincubation of the cells with IGFs (124). Conversely, it was found that IGFBPs up-regulated GHR number and activity, possibly through inhibition of IGF activity (123, 124) (Fig. 3). These findings suggest a local feedback of the GH/IGF axis at the tissue level. Thus, hypothetically, IGF decreases GHR number and activity, fine-tuned by the presence of IGFBPs (123, 125). Leung *et al.* have suggested that the negative feedback of the GH/IGF-I axis in skeletal tissue might involve three different mechanisms: a) liver-derived IGF-I inhibits pituitary GH secretion, b) bone-derived IGF-I inhibits pituitary GH secretion, and c) bone-derived IGF-I inhibits local action of GH by reducing GHR availability (125) (Fig. 4).

Retinoic acid is another modifying factor for GHR expres-

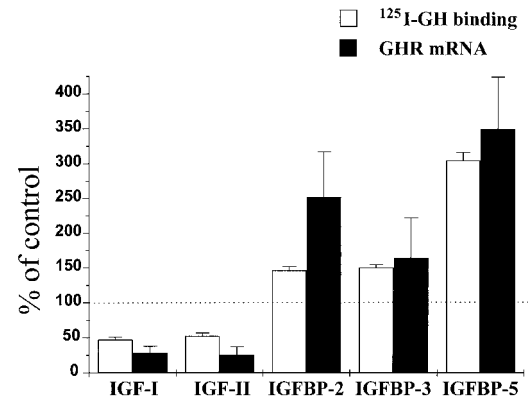

Fig. 3. Regulation of GHR expression in rat osteosarcoma cells. Effects of IGF-I (100 ng/ml), IGF-II (100 ng/ml), IGFBP-2 (3000 ng/ml), IGFBP-3 (3000 ng/ml), and IGFBP-5 (2000 ng/ml) on [<sup>125</sup>I]GH binding and GHR mRNA expression in rat osteosarcoma cells. Values are given as percent of control culture. [Figure is derived from Slootweg *et al.* (123, 124).]

sion. Similar to what was shown previously in embryonal stem cells (126), it induces an increase in GHR number in mouse osteoblasts (122). Estrogen is known to exert important effects on bone tissue, and a recent study indicates that estrogen interacts with GH action at the cellular level. In rat and human osteoblasts, 17 $\beta$ -estradiol promoted GH-stimulated proliferation and increased [<sup>125</sup>I]GH binding and GHR mRNA levels (127). High levels of glucocorticoids induce an increase in [<sup>125</sup>I]GH binding and GHR mRNA levels in rat osteosarcoma cells and GHR mRNA levels in human osteoblasts (79, 128). In contrast, corticosteroids reduce [<sup>125</sup>I]GH binding and GHR mRNA levels in primary isolated rat growth plate chondrocytes (our unpublished data). In both rat osteoblasts and in rat growth plate chondrocytes the effect of GH was reduced by high levels of glucocorticoids.

In conclusion, a regulation of GHR expression in osteoblasts may be important for 1) a local autocrine feedback loop in the GH/IGF-I axis and 2) for sex steroids, glucocorticoids, and other factors modulating the effect of GH in osteoblasts.

**4. GH signal transduction in osteoblasts.** The GHR is a member of the cytokine/hemopoietic growth factor receptor family (129). GH signaling via its receptor has now been shown to be mediated through cascades of protein phosphorylation resulting in activation of nuclear proteins and transcription factors. The GHR itself is not a tyrosine kinase. Instead, after binding of GH to its receptor, an association with a protein, JAK2, occurs. JAK2 is then phosphorylated and in turn phosphorylates the GHR (130–132). A number of signaling pathways may transduce the signal from this complex to the nucleus. The first cascade is via STAT proteins (133–135), which upon phosphorylation are translocated to the nucleus and bind to DNA. Also, the Ras-Raf signaling pathway plays a role in the GH-induced signaling (136, 137). IRS-1 and -2 are also proteins functioning as signal transducers for the GHR after they have been phosphorylated on tyrosine residues (138–140).

In mouse osteoblasts, it has been shown that GH induces the nuclear protooncogenes *c-fos*, *c-myc*, *c-jun*, and *Jun-B* (120, 141). The formation of diacylglycerol was induced, and

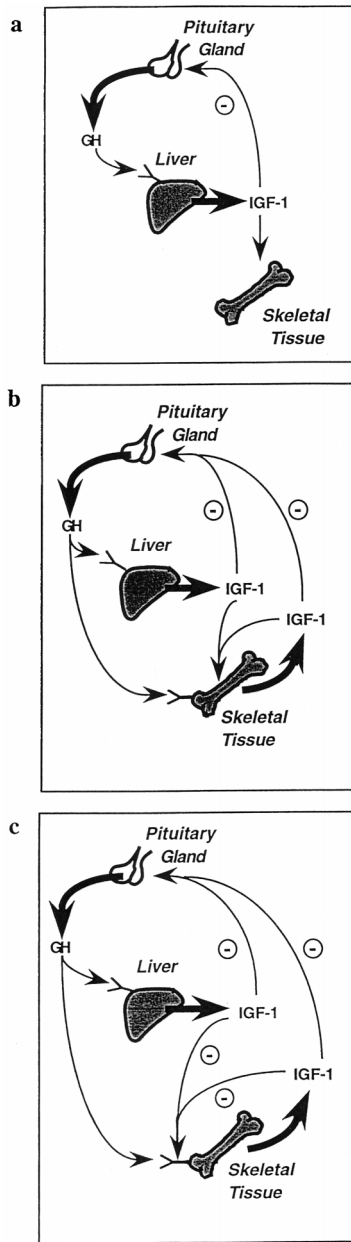

FIG. 4. Schematic representation of regulation of skeletal tissue by GH and IGF-I. Y depicts GHRs. a, Classic negative feedback mechanism. In accordance with the somatomedin hypothesis, circulating IGF-I derived from the liver in response to GH stimulates skeletal tissue growth and feeds back centrally to inhibit pituitary GH secretion. b, Modified classic negative feedback mechanism. In addition to the endocrine effects of IGF-I derived from the liver, GH is able to directly stimulate skeletal tissue growth through local production of IGF-I. Hepatic and extrahepatic sources of IGF-I contribute to feedback inhibition of GH release. c, Proposed peripheral negative feedback loop. IGF-I produced by skeletal tissue in response to GH feeds back to inhibit the local action of GH by reducing GHR availability. [Figure is adapted from Leung *et al.* (125).]

the signaling was found to be dependent on a form of protein kinase C. In these cells, the involvement of the phorbol ester-sensitive transregulating transcription factor AP1 in GH-induced gene transcription was demonstrated for the first time (141).

In rat osteosarcoma cells, another signaling protein, annexin 1, was detected recently as being tyrosine phosphorylated upon stimulation of the cells with GH (142). The tyrosine phosphorylation of this protein also occurs after stimulation of cells with epidermal growth factor, pp60<sup>v-scr</sup>, angiotensin II, and insulin (143). Although it appears as if this is a general mechanism of signal transduction in cells, the exact function of this protein is unknown, as is its place in the already known signaling cascades (143).

#### C. Effects of GH on osteoclasts

GH increases the number of osteoclasts in the metaphyseal bone of the proximal tibia of hypophysectomized rats (25). However, the mechanism for this effect is less clear. GHR mRNA has been detected in mouse marrow cultures (144) and in mouse hemopoietic blast cells (145). In a recent study by Nishiyama *et al.* (145), using mouse stromal cells and hemopoietic blast cells, it was found that GH stimulates osteoclastic bone resorption through both direct and indirect actions on osteoclast differentiation and indirect activation of mature osteoclasts. Factors that may mediate the indirect GH-regulated osteoclast formation include IGF-I and IL-6, both of which are involved in osteoclast formation and have been shown to be regulated by GH (33, 81, 145–149). It has earlier been demonstrated that IGF-I supports activation and formation of osteoclasts in cultures of unfractionated mouse bone cells (146, 149) and that osteoblasts mediate IGF-I-stimulated formation of osteoclasts in mouse marrow cultures and activation of isolated rat osteoclasts (150). Furthermore, human osteoclasts express functional IGF-I receptors (151). In another study by Ransjö *et al.* (144), using mouse marrow cultures, GH caused an inhibition of osteoclast formation by an IGF-I-independent mechanism. In summary, available data suggest that GH regulates osteoclast formation but both stimulatory and inhibitory mechanisms have been presented, probably due to differences in culture conditions. Future studies are necessary to improve the understanding of the physiology of GH-induced effect on osteoclast.

#### IV. Effects of GH on Bone Metabolism in Animals

*In vivo* animal models are useful when evaluating the influence of GH treatment on changes in bone mass, bone metabolism, and mechanical strength of bones. For histological analyses the models are excellent because it is possible to perform static and dynamic histomorphometry and to evaluate differences in regional response. Systemic GH administration increases circulating levels of other hormones that influence bone such as IGF-I and the active vitamin D metabolite (1,25-(OH)<sub>2</sub>D<sub>3</sub>) (152, 153). Until now, systemic GH administration has been used in nearly all animal experiments, and it has been impossible to elucidate whether the measured changes are caused by local or systemic (via circulating IGF-I) GH stimulation. GHRs have been detected in rat femur epiphyseal and calvarial osteoblasts using immunoreactive and mRNA techniques (80, 154). The effect of local delivery of GH to bone has been studied in rats, and the effects of local expression of GH in bone tissue in GH-transgenic mice have been presented. These recent studies, *in vivo*,



show that GH is able to stimulate bone formation via a direct interaction with bone tissue (155–158).

#### A. Effects of GH deficiency and GH replacement on bone parameters

Hypophysectomy (HX) of rats with subsequent replacement with  $T_4$  and glucocorticoid is followed by a rapid and pronounced decrease in the amount of metaphyseal and vertebral body cancellous bone. Bone volume, trabecular number, and trabecular thickness are decreased, and bone formation is minimal (159–162). The cancellous bone resorption is also enhanced. Using tetracycline labeling, dynamic histomorphometry demonstrates that bone resorption is enhanced after HX (161). The result is in accordance with the previously observed decline in bone mass but perhaps unexpected because static histomorphometric investigations have clearly shown that HX decreases the number of osteoclasts and bone surface area covered by osteoclasts (25, 162). Biochemical markers for bone formation are also decreased after HX. Thus, circulating osteocalcin declines, and the mRNA levels of osteocalcin and  $\alpha 1(I)$ -procollagen in the bone are decreased (163, 164).

When GH is given to HX rats, increases in both bone formation and the number of osteoclasts are seen (25, 161). Correspondingly, an increase in serum osteocalcin and bone mRNA levels of osteocalcin and  $\alpha 1(I)$ -procollagen is observed (163–165). Furthermore, GH, but not IGF-II, increases incorporation of radioactive thymidine and proline in femur and tibia of HX rats (165). In bone from HX rats a decrease in mRNA levels of IGF-I is found, and the levels are restored after GH replacement (163). This observation strongly suggests that GH has a direct effect on bone cells. However, the bone content of IGF-I protein was not influenced by HX. In summary, HX of rats results in a decreased bone formation with a concomitant decrease in bone mass.

GH replacement therapy restores bone formation and bone mass. Conflicting results have been presented regarding the specific effect of GH on bone resorption after HX, probably due to the fact that these animals are also lacking gonadotropins and are sex steroid deficient. Thus, the dwarf rat (dw/dw) with a normal pituitary function, except for GH deficiency, is probably more appropriate for studying the specific effect of GH deficiency. This animal model was recently used in bone mass and metabolic experiments (166–170). Cancellous bone volume, bone mineral density (BMD), and serum AP are decreased in the dwarf rats, compared with normal rats fed *ad libitum* and food-restricted animals, although the food restriction caused growth retardation that was similar to that in dwarf rats (169). Dwarf rats treated with GH showed no difference in bone volume when compared with normal animals, while BMD was decreased and serum AP increased in these animals (169). In cortical bone from these dwarf rats, GH treatment caused increased periosteal bone formation and collagen deposition and a slight decrease in BMD (170). Taken together, these studies support the earlier observations in HX rats, *i.e.*, that GH increases bone formation and bone mass in GHD animals.

#### B. Effects of GH treatment on bone parameters of animals with normal GH secretion

Normal rats have been used widely for studying the influence of GH on intact bone, and experiments have been performed in young, adult, and old rats. However, in almost all of these experiments GH administration has induced linear bone growth because the growth plates do not close until the rats are very old (171). Therefore, the data have to be evaluated in relation to both growth/modeling and remodeling (172, 173). The response pattern in rats should be compared with the situation in primates (monkeys, humans), which will be discussed later on in this section. In primates the growth plates are closed after sexual maturation and confounding factors, due to stimulation of bone growth and bone modeling, are of less importance.

1. *Effects of GH in rodents.* GH administration increases cortical bone mass in normal rats. Tetracycline labeling of the mineralization front demonstrates that GH induces subperiosteal bone formation without influencing the endosteal bone surface (174–176) (Fig. 5). The new bone is organized in a manner similar to that of adjacent bone that was formed before the start of GH injection, *i.e.*, in concentric lamellae and with the same direction of the collagen fibers. After withdrawal of GH administration, the subperiosteal bone formation ceases quickly in areas with minimal bone formation before the start of GH treatment. A remaining effect of GH, however, was found in areas where active bone formation occurred before the start of treatment. The new bone formed during GH administration is preserved after discontinuation of the treatment (176). Corresponding to the increased bone mass, there is also an increase in mechanical strength of the whole bone, and the mechanical quality of the bone itself is almost the same in GH-injected animals as in controls (175–177). The GH-induced subperiosteal bone formation also shows regional differences. At the outer surface around the lumbar vertebrae, new bone deposition is seen whereas no effect of GH is observed at the surface of the vertebrae toward the vertebral canal (178). GH also causes formation of cavities inside the cortical shell of the vertebral body in contrast to diaphyseal cortical bone in rats (178, 179), suggesting that GH exerts site-specific effects on bone.

In all these experiments the GH-treated rats gained weight. When GH was given during spaceflight, an increase in subperiosteal bone formation was seen in rats under weightless condition, and the amount of added bone was similar to that obtained by GH administration on the ground (180). This observation demonstrates that the increased bone formation caused by GH treatment was not caused by the increased mechanical stress due to the weight gain in the rats.

Cancellous bone mass of the vertebral body does not seem to be affected by GH administration in normal old rats as no differences in bone volume and bone surface/bone volume have been found (178). Apart from increasing cortical bone mass, GH also increases bone turnover. GH administration increases serum osteocalcin and increases formation of bone collagen in both cancellous and cortical bone as determined by *in vivo* labeling with radioactive proline (181–183). Bone resorption is also augmented, as shown by measuring excretion of pyridinolines and the specific marker [ $^3H$ ]tetra-

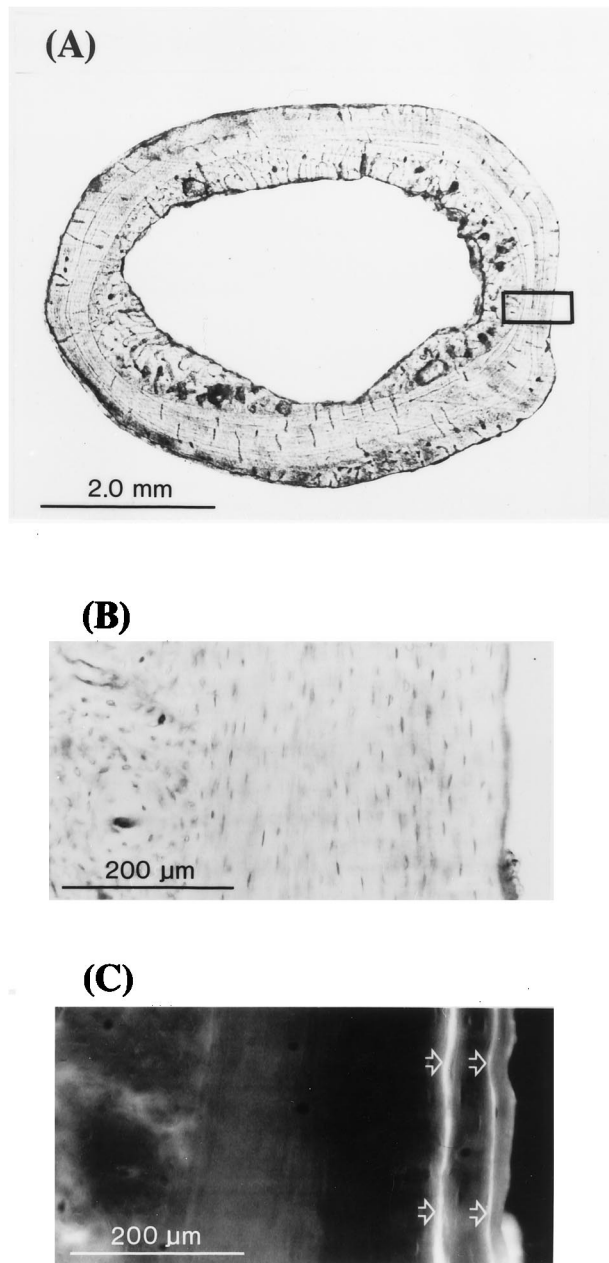

FIG. 5. GH increases periosteal bone formation in old male rats with a normal GH secretion. The rats were given GH (2.7 mg/kg/day) for 80 days. All animals were labeled with tetracycline on days 41 and 69. Only in the GH-treated group was subperiosteal tetracycline double labeling seen. Cross-sectional appearance of the femur diaphysis from a rat given GH for 80 days. A, The unstained cross-sectional appearance using light microscopy. The area inside the frame is shown using light microscopy (B) and epifluorescence microscopy (C). The two tetracycline-labeling lines (days 41 and 69) are marked by arrows. Bone formation also takes place from day 69 until animals are killed (distance between labeling line day 69 and periosteal border). [Reproduced with permission from T. T. Andreassen *et al.*: *J Bone Miner Res* 10:1057–1067, 1995 (176).]

cycline in rats labeled with [ $^3\text{H}$ ]tetracycline before GH treatment (184). Because bone matrix is a major reservoir for IGF-I, Yeh *et al.* measured the content of bone matrix IGF-I after 9 weeks of GH treatment. However, these investigators

found no increase in bone matrix content of IGF-I in the GH-treated animals (181).

Intermittent PTH injection to rats increases bone mass primarily by inducing endosteal and cancellous bone deposition, whereas the subperiosteal bone deposition is modest (185, 186). When GH and PTH are given simultaneously, a substantial increase in bone mass of vertebral bodies is seen because the GH-induced subperiosteal bone deposition takes place together with the PTH-induced endosteal and cancellous bone deposition (187), suggesting that different treatment protocols using combinations of PTH and GH might be clinically useful.

In summary, these results from GH-treated rats with a normal GH secretion clearly demonstrate that GH increases cortical bone mass by inducing subperiosteal bone formation while no large effect on cancellous bone mass is seen.

**2. Effect of GH in transgenic mice.** The creation of the first giant GH-transgenic mouse in 1982 attracted considerable attention from scientists as well as the popular press (65, 188). The extent of GH expression and tissue distribution of GH in the transgenic mice depend on which promoter is attached to the GH gene. In most bone metabolic studies, the metallothionein promoter (MT) fused to the GH gene has been used, resulting in very high serum levels of GH (188–194). However, two new GH-transgenic lines with a tissue-specific expression resulting in high local concentrations of GH without affecting serum concentrations of GH have recently been described: 1) Baker *et al.* (158) used the osteocalcin promoter, resulting in GH expression in osteoblasts; 2) Saban *et al.* (156) used GH driven by  $\beta$ -globin regulatory-elements, resulting in an erythroid expression with an “adult” expression in the bone marrow.

The femora of MT-GH-transgenic mice with very high serum concentrations of GH demonstrate an increased bone growth, an increased BMC, no change in BMD (BMC/vol), and an increased mechanical strength (188, 194). The increase in mechanical strength was due to an increased cortical width and not due to an improved quality of the bone. Rather, one of the parameters measuring the quality of the cortical bone, the E-module, was decreased in GH transgenic mice (194). It should be emphasized that these mice have been exposed to supraphysiological serum levels of GH (more than 10 times increased) from late prenatal life (194). Interestingly, disproportionate skeletal gigantism has been found in adult MT-GH-transgenic mice, suggesting that supraphysiological GH levels exert differential effects on different parts of the skeleton (189). These studies in GH-transgenic mice with increased serum concentrations of GH give support for the fact that GH increases cortical bone formation, resulting in an increased mechanical strength of the bone. However, the net result on bone mass in old MT-GH-transgenic mice is also highly dependent on bone growth and bone modeling.

The erythroid-specific GH-transgenic mice had increased cortical bone thickness, and the authors suggested that the local effect of GH from erythroid cells in the bone marrow is a major contributor to the increased bone deposition in these GH-transgenic mice (156). However, a slight increase in serum levels of GH was seen, indicating that some of the effect of GH may have been systemic. In the osteoblast promoter-



driven GH-transgenic mice the femora demonstrated an increased growth, increased cortical width, and an increased mechanical strength (157, 158). Similar to the situation in the MT-GH-transgenic mice the quality of the bone, as measured with the E module, was decreased (157, 194). As the serum levels of GH were not increased in these GH-transgenic mice, it was concluded that the stimulatory effect on bone formation was caused by local effect of GH.

GH-transgenic mice have also been used as a model to study the functional interaction between male and female sex steroids with increased expression of GH. It was found that preserved gonadal function was a prerequisite for the increase in bone mass caused by overexpression of GH (192, 193).

3. *Effects of GH in primates.* As discussed above, GH exerts potent effects in rodents, resulting in an increased bone formation. However, it is possible that some of these effects are due to bone growth and bone modeling, as rodents close the epiphyseal plate late in life. The monkey is a primate and the bone metabolism in these animals is more similar to that of humans. The effect of GH has been studied in hypogonadal female monkeys. The monkeys were made hypogonadal by treatment with a GnRH agonist for 10 months, resulting in a 12% decrease in BMD (BMC/area). GH supplementation (100  $\mu\text{g}/\text{kg}/\text{day}$ ) reduced the decline of BMD in GnRH agonist-treated monkeys (195). A recent study, using old female monkeys, demonstrated that GH (100  $\mu\text{g}/\text{kg}/\text{day}$ ), but not IGF-I (120  $\mu\text{g}/\text{kg}/\text{day}$ ), given for 7 weeks increased bone formation as measured with mineral apposition and bone formation rates (196) (Fig. 6). No additional effect was seen when IGF-I was given together with GH. The effect was seen both in the tibia and in the femur whereas no significant effect was seen in the vertebrae. The difference between the long bones (predominantly cortical bone) and the vertebrae

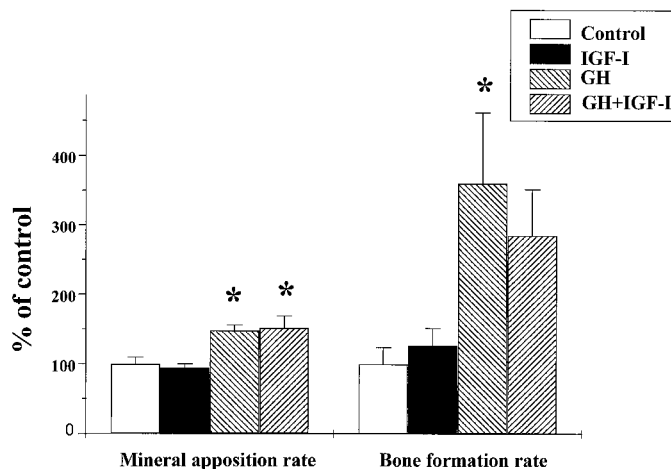

FIG. 6. Histomorphometric study of effect of GH and/or IGF-I treatment in old female monkeys. GH (100  $\mu\text{g}/\text{kg}/\text{day}$ ) but not IGF-I (120  $\mu\text{g}/\text{kg}/\text{day}$ ) given for 7 weeks increased bone formation in the tibia as measured with mineral apposition rate and bone formation rate. No additional effect was seen when IGF-I was given together with GH. Mineral apposition rate was measured as micrometers per day, and bone formation rate was measured as cubic micrometers per  $\mu\text{m}^2/\text{yr}$  with a surface referent. Values are means  $\pm$  SEM of control. \*,  $P < 0.05$  vs. control. [Figure is derived from Ref. 196.]

(predominantly cancellous bone) in terms of GH responsiveness is similar to what has been described earlier in old rats. These experimental studies of primates are promising for future human clinical studies. However, further long-term studies with GH treatment of primates are needed to elucidate whether the increased bone formation results in an increased bone mass and mechanical strength.

4. *Effects of GH in OVX animals.* Ovariectomy in rats results in a substantial loss of cancellous bone and an increase in bone turnover rate (197–199). In cortical bone, ovariectomy results in enhanced resorption at the endosteal surface, whereas bone formation at the periosteal surface initially increases, but thereafter reacts as seen in intact animals (200–202). OVX rats have been accepted as an animal model of postmenopausal bone loss and the current FDA “Guidelines for preclinical and clinical evaluation of agents used in the treatment or prevention of postmenopausal osteoporosis (1994)” recommend that new potential agents first should be evaluated in the OVX rat model (203–205). As GH is a potential anabolic agent, there have recently been a number of studies in which GH was given systemically to OVX rats (187, 206–209). GH increases cortical bone mass by inducing subperiosteal bone formation (187, 207). In the OVX model, where cancellous bone mass is normally measured in the tibial metaphyses or inside the vertebral body shell, the results show an increase in bone volume, bone surface/bone volume, mineralizing surface, osteoid surface, and osteoclastic surface in response to GH treatment (187, 206, 208). In addition, the mechanical strength of the vertebral body is increased and correlates well with the increase in bone mass (187, 210). The results of GH treatment on cancellous bone seems rather promising, but it must be emphasized that GH also stimulated linear bone growth, which makes the interpretation of the results difficult. At present, it is not known whether there is any relationship between linear growth and an increased cancellous bone volume in this model. GH was unable to augment cancellous bone volume in old rats that do not show linear growth, although GH increased cortical bone mass considerably in these animals (176, 178). In OVX rats the bone metabolism is enhanced, and no further increase in pyridinoline excretion, circulating osteocalcin and cancellous bone osteoid, or mineralizing surfaces has been observed after treatment with a low dose of GH (209).

These studies, using OVX rats, indicate that GH alone or in combination with another hormone may be useful in the treatment of postmenopausal osteoporosis. However, further studies need to be performed in old OVX rats and primates with closed growth plates.

5. *Effects of GH in animals treated with glucocorticoids.* In rats, rabbits, and dogs, glucocorticoid treatment has been shown to decrease bone formation and bone mass (211–214). The effects, however, vary with species and in the rat model low doses of glucocorticoids increase bone mass and mechanical strength of bone whereas higher doses decrease bone formation, bone mass, and bone strength (215–217). In mice, simultaneous administration of GH and glucocorticoids prevents the catabolic effect of glucocorticoids whereas this does not seem to be the case in rats. However, the number of

experiments is still very limited, which is why the interpretation should be cautious. Using mice, Altman *et al.* (218) showed that glucocorticoids caused a decline in linear bone growth, trabecular bone volume, cortical bone width, mineral bone content, and bone alkaline- and acid-phosphatase activity. The observed declines in different bone parameters were inhibited when glucocorticoid and GH were given simultaneously. The results correspond well with histological data obtained in a trial in children when GH and glucocorticoid were given either separately or simultaneously (219). In rats a short dose-response study showed that GH is able to prevent glucocorticoid-induced growth inhibition (220). In long-term experiments, however, GH does not seem to counteract the glucocorticoid-induced decline in linear growth, bone formation, and bone mass, although GH alone increases these parameters (179, 221).

### C. Effects of GH on fracture healing

When movements between the ends of a fractured bone are possible, bone healing is initiated by formation of a thick periosteal callus of woven bone with a central area of cartilage. Through endochondral ossification the cartilage is subsequently replaced by woven bone. Later in the healing phase, a marked modeling takes place and hereby the callus volume declines and the density is enhanced (222, 223). As GH stimulates both periosteal bone formation and linear growth where bone formation takes place by endochondral ossification, it has been natural to examine the effect of GH treatment on healing bones.

In rats, GH administration increases callus formation and mechanical strength of healing fractures (224–229). The enhanced rate of healing continues after withdrawal of GH (230, 231). A considerable delay in mechanical strength development of healing fractures is seen in old rats and GH treatment partly prevents this delay (232, 233). Augmented callus formation is found in the rat bone defect model, when GH is administered both systemically and locally (155). GH has not previously been applied locally either to intact bone or healing fractures, and the data imply that GH exerts a direct, non-liver-mediated effect on bone tissue (155). In studies in which rats were used, only a few papers show no effect of GH on healing bone defects and fractures (234, 235), and GH has not been able to stimulate formation of new bone in titanium bone conduction chambers (236).

In rabbits, GH has not been able to increase callus formation or mechanical strength in healing fractures and bone defects (234, 237–239). However, when subperiosteal bone formation was induced by applying a cerclage band around the femur, GH was able to enhance bone formation in rabbits (240).

In dogs, GH administration augments callus formation in bone defects, and in human trials GH treatment stimulates healing of fractures and pseudoarthroses, when evaluated by radiographs and clinical examination (241–244).

In summary, GH treatment in rats obviously increases callus formation and the mechanical strength of healing bones, whereas the response in the rabbit model seems to be much weaker. At present, it is not possible to evaluate whether GH treatment has any role in human fracture heal-

ing because only a few clinical trials and experiments in higher animals have been performed.

## V. Effects of GH on Bone Metabolism in Humans

### A. Bone metabolism in patients with acromegaly and GH deficiency

1. *Acromegaly.* Active acromegaly has consistently been associated with increased bone turnover (245–252). In a study of 16 acromegalic subjects, osteocalcin concentration was increased 2-fold, and urinary excretion of hydroxyproline increased 3-fold compared with control subjects (251). The serum concentration of osteocalcin is positively correlated to GH and/or IGF-I concentration (252). Successful treatment of these patients normalized serum osteocalcin and the urinary excretion of hydroxyproline (252, 253). Octreotide treatment reduced osteocalcin concentration but not type I procollagen (PICP) (254). The net effect of the increased bone metabolism in untreated acromegaly has been obscured in some studies by confounding factors such as hypogonadism (255). In fact, many years ago acromegaly was seen as a cause of osteoporosis (256) whereas later studies revealed normal or more often increased bone mass in patients with acromegaly without gonadal insufficiency (251, 255, 257–261). The trabecular bone density of the lumbar spine in patients with acromegaly was decreased in one study, as determined by quantitative computerized tomography, while it was increased in another study using dual energy x-ray absorptiometry (DEXA) (246, 262). In contrast, bone histomorphometric investigations in patients with acromegaly disclosed a significant increase in both cortical and trabecular bone mass in iliac crest. In trabecular bone, resorption surfaces and active and total formation surfaces were increased (249). BMD assessed with DEXA was increased in the proximal femur whereas the BMD of the lumbar spine was similar to that of healthy controls (251). In summary, most studies suggest that cortical bone mass is increased in acromegaly (4, 5, 249, 251, 255, 260, 262) whereas trabecular bone seems largely unaffected.

2. *GH deficiency (GHD).* There is no conclusive data on the effects of GHD on bone remodeling in adults. Serum levels of osteocalcin, reflecting osteoblast activity and bone formation, have been found to be decreased (263–267), increased (268), or unchanged (269). Most studies have shown that there is no difference in resorption markers between controls and adult GHD patients (264, 268, 270).

a. *Bone mass in adult patients with childhood-onset GHD.* In children with GH deficiency, a relative osteopenia is found before the start of exogenous GH treatment, an effect that might be due to a delay in skeletal maturation (271–273). Several studies have shown low bone mass in adults with childhood-onset GHD (268, 273–280). In a cross-sectional study of 30 young adult males, with childhood-onset GHD, Kaufman *et al.* (273) found decreased bone mineral content in the lumbar spine and forearm compared with age- and height- matched controls. The BMC in the lumbar spine was shown to be between 9 and 19%, and in the forearm 20 and 30% lower compared with controls, using dual- and single-photon absorptiometry, respectively. A similar decrease in

BMC was observed in patients with multiple pituitary deficiencies and isolated GHD. These observations were recently confirmed by de Boer *et al.* (275) who performed a similar cross-sectional study in 70 adult men with childhood-onset GHD. This investigation found that the BMD area (BMC/bone area) in GHD patients was significantly reduced at the lumbar spine as well as the nondominant hip. In fact, in 33% of the patients the lumbar spine BMD area was at least 2 SD lower than normal. They also observed a positive relationship between body height and BMD area. Patients and controls differed in body height, which partly explained the difference in BMD area. However, also after correction for bone size, the difference in BMD area between patients and controls still remained. Similar results were obtained in patients with multiple pituitary deficiencies and isolated GHD.

The similar results observed both by Kaufman *et al.* and de Boer *et al.* in patients with multiple pituitary deficiencies and isolated GHD suggest that lack of GH is the most important factor behind the observed low bone mass in childhood onset GHD (273, 275). A reported reduction in vertebral trabecular bone density assessed by CT technique in 10 males with childhood-onset isolated GHD further supports this conclusion (274). There is no evidence suggesting that bone loss is enhanced after cessation of GH treatment in young adults (273). Thus, it is conceivable that insufficient acquisition of bone mass during childhood and thus reduced peak bone mass explain the reduced BMC and BMD observed in these patients. The cause of the reduced bone mass is probably suboptimal GH therapy in these patients. Patients included in the cited studies were mainly treated with GH when the supply of GH was limited, and the doses used were lower and cessation of treatment occurred earlier than current pediatric practice. In patients with hypopituitarism of childhood onset, the induction and timing of puberty are also important in reaching the optimal peak bone mass. Boys with constitutionally retarded puberty will achieve a lower peak bone mass than boys with puberty of normal onset (281). At present there are no studies showing that GH replacement during childhood results in a normalization of BMD when peak bone mass is reached, suggesting that GH also is important for the additional increase of bone mass that occurs after completion of linear growth. It has been suggested that GH treatment should be continued until the attainment of peak bone mass, irrespective of the height achieved (282).

*b. Bone mass in adult patients with adult onset GHD.* An increased prevalence of osteoporosis has been found in several recent studies of patients with adult-onset GHD (283–289). In a population of 122 hypopituitary patients, Wüster *et al.* (283) observed that 57% of the patients had low bone mass of lumbar spine as assessed with dual photon absorptiometry, and 73% of the patients had low bone mass of the proximal forearm as assessed with single photon absorptiometry. Johansson *et al.* (284) studied 17 adult GHD men and found that total, but not spinal, BMD, measured with DEXA, was lower in the patients compared with controls. In a study by Rosén *et al.* (286) of 95 (55 males and 40 women) patients with adult-onset GHD with a mean age of 54 yr, BMC was assessed in the third lumbar vertebra with dual-photon absorptiometry. The control population comprised 214 women aged 35–80 yr and 199 men between 16 and 79 yr of age. BMC

was found to be lower in all males and in females with untreated as well as treated gonadal deficiency. BMC was lower in patients below 55 yr of age and normal in patients above 55 yr of age. Holmes *et al.* (287) measured vertebral trabecular BMD with quantitative computed tomography (QCT), total BMD and BMD in lumbar spine and hip with DEXA, and BMC in the forearm with single photon absorptiometry (SPA) in adult patients with GHD. There was a highly significant reduction in QCT and in DEXA of the lumbar spine and in SPA of the forearm in these patients. Similarly, as has been shown in patients with childhood-onset GHD, there was no difference in Z-scores between those patients with isolated GH deficiency and those with GH and gonadotropin deficiency. In a subgroup analysis of patients with an estimated age above 30 yr at the onset of the disease, a reduction was still present in QCT and in DEXA of the lumbar spine, and in SPA of the forearm. Interestingly, older adults had less reduction in bone mass than younger, confirming the observation by Rosén *et al.* (286, 287). In a cross-sectional study comprising 64 hypo-pituitary patients, Beshyah *et al.* (288) demonstrated a significant reduction in lumbar spine BMD and BMC in both male and female patients compared with controls. The area and the width of the vertebra were similar in patients and controls. In contrast, Degerblad *et al.* (289) observed normal total, spine, and hip BMD in males with adult onset GHD and Kaji *et al.* (290) found a normal BMD in the spine and midradius of patients with adult onset GHD. However, Degerblad *et al.* (289) found low total, spine, and hip BMD in women with adult onset GHD. A recent study in elderly patients (over 60 yr old) with adult-onset GHD demonstrated normal BMD in the hip and the lumbar spine (291). In summary, most studies demonstrate that patients 55 yr of age or less with adult-onset GHD have decreased bone mass.

*c. Fracture rate in GHD patients.* Few studies have investigated whether or not GHD patients have an increased fracture rate. The reasons for this are probably that a huge number of GHD patients are required for a meaningful study and/or that additional pituitary hormone deficits may confound the results. However, an increased risk of osteoporotic vertebral fractures has been suggested in hypopituitary patients (283). The consequences of low BMD in GHD adults have only recently been delineated by Rosén *et al.* (292) who found a higher fracture rate in patients with adult-onset GHD compared with that in healthy controls. The fracture rate was studied in 107 patients with adult-onset GHD, and a subsample of the Göteborg WHO MONICA Study was used as a reference population. The total fracture frequency was 2- to 3 times higher in the patients compared with the controls. Confounding factors such as longstanding untreated hypogonadism might have contributed to the low bone mass in some subjects, since most of the studied patients also had other pituitary deficiencies. On the other hand, Holmes *et al.* (287) found a similar reduction in bone mass in patients with isolated GHD and in those with multiple pituitary deficiency. Since peak bone mass may not be reached until the third or fourth decade of life (293), failure of accretion of bone mass may also be partly responsible for the reduced BMD in adult-onset GHD. Again, since patients who acquired their GHD after the age of 30 also have reduced



bone mass, it is likely that GH *per se* is important for the maintenance of the adult bone mass (287).

**3. Treatment of GHD patients with GH.** GH treatment of GHD adults has consistently been shown to have marked effects on markers for bone formation [serum osteocalcin, serum levels of C-terminal propeptide of PICP, and AP] and bone resorption [urinary hydroxyproline, collagen cross-links, and serum concentrations of collagen type I telopeptide (CITP)] and serum IGF-I levels (263, 266–270, 279, 289, 294–309). There is a dose-dependent increase of bone markers during GH treatment (266, 309), and the increase in resorption- and formation markers was maximal after 3 and 6 months, respectively (300, 304). The similarity in time courses of the bone markers supports the concept of a temporal coupling between bone resorption and bone formation, with resorption preceding formation during bone remodeling (300). After 2 yr of GH treatment these markers were still elevated, suggesting that the increased rate of bone remodeling was sustained (304). An increased bone turnover and an increased cortical thickness, as studied by histomorphometric indices, was found after GH treatment in a study of GHD men (310). Similarly, increased bone turnover has been observed in patients with long-standing acromegaly (251), indicating that bone turnover can be elevated for many years as a result of high plasma levels of GH. Furthermore, indices for bone formation remain elevated for several weeks after short-term treatment with GH, suggesting that the half-life for processes reflecting bone resorption/formation is quite long (302, 311). Administration of GH to healthy volunteers for 7 days produced no discernible effect on serum calcium concentration, but urinary calcium excretion increased. Serum PTH concentrations increased, as did the concentrations of phosphate and 1,25-dihydroxyvitamin D (312). In contrast, in other double blind, placebo-controlled trials (6 months duration) of adult GHD patients, no effect on 1,25-dihydroxyvitamin D concentrations (313) and no effect (313) or a decrease (296) in intact PTH concentrations was found. These changes were accompanied by a concomitant increase in total serum calcium concentrations (296, 313). A similar increase in serum calcium concentrations has been observed by others (297, 299, 300). Still, after 2 yr of GH treatment, serum calcium concentration was elevated compared with baseline (304). GH may enhance 1 $\alpha$ -hydroxylase activity (314), thus increasing the concentration (315) or availability (316) of vitamin D<sub>3</sub>, which is conceivably the mechanism behind the sustained increase in serum calcium concentration. An alternative hypothesis is enhanced mobilization of skeletal calcium due to increased bone turnover.

Trials involving adults with childhood onset GHD have yielded conflicting results regarding the effect of GH on bone mass. Several short-term placebo-controlled (306–308) and short-term open trials (268, 278, 294, 299) have failed to show any increase in BMD or BMC during GH treatment. In fact, some of these studies (299, 306, 307) reported a slight decrease of BMD or BMC after 3–6 months of treatment. In contrast, O'Halloran (274) reported an increase in vertebral BMD assessed with QCT after 6 months of GH treatment but no changes in proximal or distal forearm BMC. After more prolonged treatment periods (12–30 months), several studies

have disclosed more encouraging results (274, 305, 307, 317). Degerblad *et al.* (317) showed an increase in distal and proximal forearm BMD in six patients by 12 and 3.8%, respectively, after 24 months of treatment. Similarly, Vandeweghe *et al.* (307) reported a significant and progressive increase in BMC above pretreatment values, reaching 7.8% for total BMC at the lumbar spine and 9.9% for total BMC at the forearm, after 30 months of GH administration.

Short-term trials of 6–18 months in adults with adult onset GHD (263, 289, 297, 298, 300) failed to show any increase in BMC or BMD. In analogy with the findings observed in adults, with childhood onset GHD, several studies have shown a decrease in BMD and or BMC after 6–12 months of treatment. Holmes *et al.* (263) observed a decrease in BMD after 6 months of treatment at several skeletal sites. After 12 months of treatment, however, there was only a significant reduction in lumbar spine BMD. Similarly, Degerblad *et al.* (289) showed a decrease in total body and lumbar spine BMD after 6 months of GH treatment, but after 12 months of GH treatment there were no differences compared with baseline values. Furthermore, Hansen *et al.* (300) showed that in a placebo-controlled trial of 12 months, a decline occurred in forearm BMC and BMD by 4.2 and 3.5%, respectively. In contrast, in the longest placebo-controlled trial reported so far (18 months), Baum *et al.* (295) reported a significant increase in BMD in lumbar spine and femoral neck of 5.1 and 2.4%, respectively, using a daily dose of GH of only 4  $\mu$ g/kg. Surprisingly, BMD increased at sites mostly composed of trabecular bone but not at sites composed of cortical bone. Since bone absorptiometry only detects the mineralized component of the bone, the reduction in BMD observed after short periods of GH treatment is best explained by the increased remodeling activity, with an increased remodeling space and an increased proportion of new unmineralized bone. Interestingly, the addition of a bisphosphonate to GH therapy in GHD adults reduced the GH-induced bone turnover and prevented the initial decrease in bone mineral content seen during GH treatment alone (318). Therefore, bisphosphonates might perhaps be an important adjunct to GH replacement therapy in adults with GHD and severe osteopenia during the early phase of GH treatment. However, if bone resorption is a prerequisite for bone formation, it is possible that an initial GH-induced bone resorption is crucial for the following GH-promoted bone formation.

Johannsson *et al.* (304) recently demonstrated that 2 yr of GH treatment in 24 men and 20 women with adult-onset GHD induced a sustained increase in overall bone remodeling activity and a net gain in BMD in several weight-bearing skeletal locations (Fig. 7). A significant increase in BMD first became apparent after 18 months, which might explain why previous trials of shorter duration were unable to demonstrate an increase in BMD. The study also demonstrates the importance of an adequate duration of treatment to include a sufficient number of remodeling cycles and sufficient time for mineralization to occur before a net gain in BMD can be detected with bone absorptiometry. After 2 yr of GH treatment, the total body BMC increased but not the total body BMD. Furthermore, the increment in BMC was slightly more marked than the increment in BMD at the different skeletal loci, suggesting that there was an increase

FIG. 7. BMD (BMC/area) in response to 2 yr of GH treatment in two subgroups of patients with adult-onset GH deficiency. One group comprised 13 patients with a baseline z-score of less than  $-1$  SD (broken line), and the second group comprised 31 patients with a baseline z-score of  $-1$  SD or more (solid line). Values are given as means  $\pm$  SEM. *P* values denote the difference between the percent changes from baseline in the two groups of patients by two-way ANOVA. [Reproduced with permission from G. Johannsson *et al.*: *J Clin Endocrinol Metab* 81:2865–2873, 1996 (304). © The Endocrine Society.]

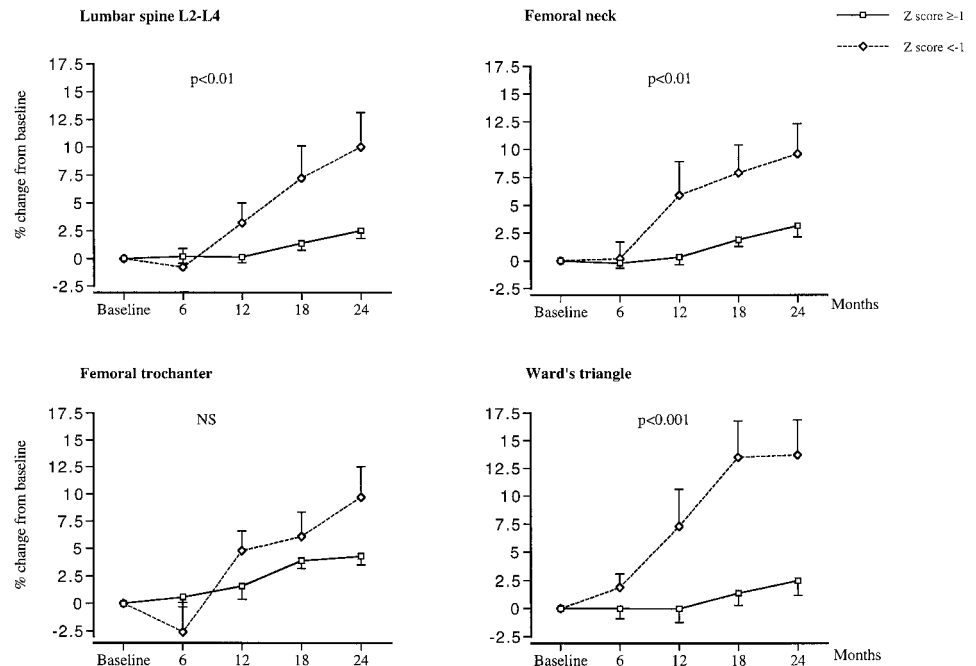

in the bone area. A similar increase in bone area after GH treatment of rats has been described in detail in *Section IV*. Interestingly, patients with a z-score of less than  $-1$  SD demonstrated the most pronounced increase in BMD (Fig. 7), reducing the calculated number of patients with the greatest fracture risk by 40–50%, dependent on skeletal loci. However, this calculation is based on the assumption that the changes in quality of bone in GHD adults are similar to what was earlier described in postmenopausal women. Furthermore, it should be emphasized that half of the patients in the study by Johannsson *et al.* (304) were given a supraphysiological GH dosage, which resulted in abnormally elevated IGF-I levels (304). This study suggests that the remodeling balance during GH treatment in GHD adults is positive, particularly in those with a low pretreatment BMD. This is supported by a study demonstrating a continuous increment in forearm cortical BMC 13 months after the discontinuation of GH treatment (319).

A gender difference has also been observed in response to GH. Thus, males responded with a higher increase in serum osteocalcin, PICP, and CITP concentrations, whereas women increased more in total BMC and BMD. This suggests that the interaction between GH and estrogens induces a more positive remodeling balance with less increment in bone-remodeling activity than the interaction between GH and androgens (304).

#### B. Effects of the GH/IGF-I axis on bone metabolism and bone mass in patients with normal GH secretion

1. *Osteoporosis*. The causes of osteoporosis are complex and multifactorial. Bone mass decreases with aging, but the mechanisms behind this decrease are unclear. Aging is associated with a decrease in GH secretion (320, 321) and serum IGF-I concentration (322). The GH/IGF-I axis is also influenced by lifestyle factors. For example, smoking decreases

IGF-I while physical activity increases GH secretion (322). It has been suggested that the GH/IGF-I axis is one of the major determinants of adult bone mass (323, 324). Thus, a positive relationship between BMD and serum concentrations of IGF-I and IGFBP-3 was observed in healthy men (325). Furthermore, in a study of 245 healthy elderly women, serum IGF-I concentration was found to be an independent predictor of total BMC (326). Circulating levels of IGF-I have been reported to be significantly lower in men (327) and women (328) with osteoporosis. In addition, low plasma levels of IGF-I and IGFBP-3 were found in both male and females with osteoporosis (329), and a relationship has been shown between baseline IGF-I and femoral bone density in women over 70 yr of age (326). Furthermore, IGF-I concentrations are decreased in the skeletons of elderly patients, suggesting that the normal age-dependent decrease in bone mass may be due to a local IGF-I deficiency in the skeleton (330). In contrast, no differences in serum levels of IGF-I, IGF-2, or IGFBP-3 were observed between women with osteoporosis and normal age-matched controls (331, 332).

Several studies have demonstrated that GH increases markers for bone resorption as well as bone formation in subjects with a normal GH secretion. GH increases bone turnover in young healthy male volunteers (311) (Fig. 8) as well as in osteopenic postmenopausal women (333). Osteoporotic patients display similar responsiveness to GH as healthy subjects in the regulation of bone markers for bone formation and bone resorption (334). In a small study in which three patients with primary and secondary osteoporosis were treated with GH, an increase of periosteal new bone formation, as determined with bone histomorphometry, was seen (335). This increase in periosteal bone formation is interesting as it is similar to what has been found in experimental studies (176). However, larger clinical studies with bone histomorphometric analyses are needed to con-

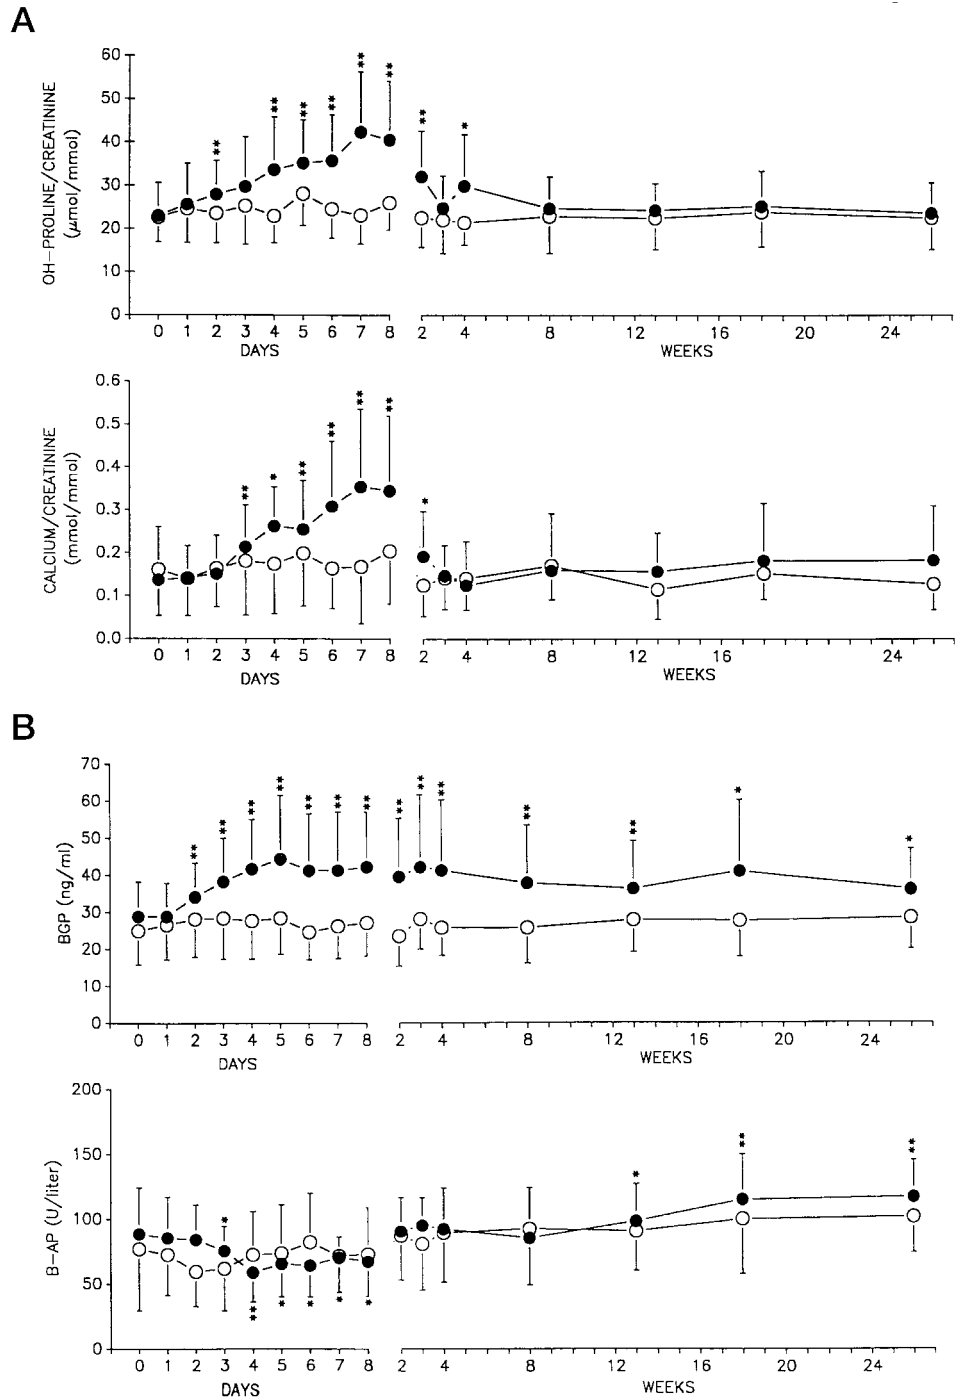

FIG. 8. Effect of 7 days treatment with GH (filled circles,  $n = 10$ ) and placebo (open circle) on biochemical markers of bone resorption (panel A) and bone formation (panel B) (mean  $\pm$  SD) in normal male volunteers. The GH dosage was 0.1 IU/kg twice a day administered subcutaneously. \*,  $P < 0.05$  and \*\*,  $P < 0.01$  difference from pretreatment values. [Reproduced with permission from K. Brixen *et al.*: *J Bone Miner Res* 5:609–618, 1990 (311).]

firm that GH induces periosteal bone formation in patients with osteoporosis.

Present treatment modalities of osteoporosis rely almost exclusively on agents aiming at reducing bone resorption. In contrast, GH has a stimulatory effect on bone formation as well as bone resorption, as measured with biochemical parameters, and the gain in BMC/BMD that was observed after long-term GH treatment in adult GHD occurred after the first remodeling cycle (304). There are no GH treatment trials yet of adequate duration ( $>18$  months) in patients with postmenopausal osteoporosis. Aloia *et al.* (336) demonstrated no

net gain of total body calcium in osteoporotic women after 12 months of GH treatment. In a 2-yr study of postmenopausal women, addition of GH to continuous, combined, or sequential calcitonin treatment had no additional effects on total body calcium (337, 338). No additional effect of GH treatment was found on bone mineral mass in postmenopausal women treated with pamidronate during 12 months and with the addition of GH for 6 months. On the contrary, the beneficial effect of pamidronate on bone mass and the reduction of biochemical markers for bone turnover was blunted by the addition of GH (339). Holloway *et al.* (340)



recently conducted a study in which postmenopausal women were given cyclic GH treatment for 7 days every 56th day. This cyclic treatment was repeated 12 times and resulted in a small but statistically significant increase in BMD of the lumbar spine and of the hip (1–2%). A cyclic block of bone resorption with calcitonin did not alter the effect of GH in this study. In summary, decreased serum levels of IGF-I/IGFBP-3 are associated with osteoporosis, indicating that the GH/IGF axis is involved in the pathogenesis of osteoporosis. It is not yet shown whether GH increases bone mass in patients with osteoporosis. However, most of the reported studies have been short-term studies, and future long-term studies are needed to determine whether prolonged GH treatment increases bone mass.

The present treatment of postmenopausal osteoporosis includes calcium, vitamin D, calcitonin, bisphosphonates, and estrogen replacement therapy. Ho *et al.* (341, 342) presented data indicating that oral estrogen treatment decreases serum levels of IGF-I and increases GH secretion. The authors claim that oral estrogen results in an impaired hepatic IGF-I production with a concomitant reduced feedback inhibition of GH secretion. In contrast, transdermal estrogen treatment resulted in a slight increase of IGF-I and had no effect on GH secretion. However, Friend *et al.* (343) demonstrated more recently that both transdermal and oral estrogen increase GH secretion and decrease serum levels of IGF-I. These results indicate that the GH/IGF axis also may be involved in the pathophysiology of postmenopausal osteoporosis, and it should be considered in the choice of treatment in patients with postmenopausal osteoporosis.

Deficiency in bone mineral has been widely reported in Turner's syndrome (344, 345). It is generally accepted that osteopenia in Turner's syndrome is believed to be due to estrogen deficiency and not skeletal dysplasia *per se*. Twelve months treatment with GH did not increase spinal BMD in these patients (346). However, long-term treatment of Turner's patients with GH resulted in a normal bone mineral status (347, 348).

2. *Effects of GH in elderly.* Studies in healthy subjects have not shown any impressive effect of GH on bone mass. Rudman *et al.* (349) studied elderly men above 60 yr of age and reported a slight (1.6%) increase in lumbar BMD after 6 months of treatment. BMD did not change during a 6-month placebo-controlled trial with GH in healthy elderly women, whereas a slight decrease was observed in the placebo group. Marked increases during GH treatment were observed in hydroxyproline and pyridinoline excretion (107, 312). However, serum osteocalcin did not change in women receiving estrogen therapy and increased only in those without estrogen treatment (107) suggesting, in concordance with the data by Ho and Weissberger (342) described above, that hepatic IGF-I generation was suppressed due to oral delivery of estrogen. A positive effect of GH on bone mass in GHD patients is not seen until 18 months of treatment. Thus, long-term studies (>18 months) to explore whether GH increases bone mass in elderly patients are needed before further conclusions regarding the effect of GH on bone mass in these subjects can be made.

3. *Corticoid-induced osteoporosis.* Glucocorticoid-induced osteoporosis is characterized by a concomitant decrease in bone formation and increase in bone resorption (350). Short-term GH treatment for 7 days in patients receiving chronic glucocorticoid treatment for autoimmune disorders resulted in a significant increase in serum osteocalcin, PICP, and CIP concentrations (351). Further long-term studies are needed to clarify whether or not GH is useful on glucocorticoid effects in bone.

4. *Effect of IGF-I.* Regarding longitudinal bone growth, IGF has been suggested to be a mediator of some of the GH effect in its regulation of bone remodeling. Because of its potent mitogenic propensity on osteoblasts, IGF-I has been thought to have potential as a formation-stimulating drug in the treatment of osteoporosis. The first clinical study, in which IGF-I (160  $\mu\text{g}/\text{kg}/\text{day}$ ) was given for 7 days to one male with idiopathic osteoporosis, indicated that IGF-I increases biochemical markers of both bone formation and bone resorption (352). Normal women were treated for 6 days with different doses of IGF-I: 30, 60, 120, and 180  $\mu\text{g}/\text{kg}$  body weight each day. Numerous side-effects were observed with the two highest treatment doses but none with the lowest dose (353). A dose-dependent increase in PICP (an index of collagen synthesis) and of urinary excretion of deoxypyridinoline were observed, confirming that IGF-I influences both biochemical markers for bone formation and bone resorption. In contrast, Ghiron *et al.* (354) observed that lower doses of IGF-I (15  $\mu\text{g}/\text{kg}/\text{day}$ ) exerted no effect on resorption markers while osteocalcin and PICP increased progressively in elderly women. The authors claimed that a low dose of IGF-I is independently capable of stimulating bone formation without inducing bone resorption. Higher doses of IGF-I gave similar results on markers for bone formation and bone resorption as did GH. In a study (302) of men with idiopathic osteoporosis, the effects of GH and IGF-I on bone metabolism were compared after 7 days of treatment. Both treatment regimens gave a similar increase in osteocalcin concentration and increase in urinary excretion of deoxypyridinoline. However, IGF-I treatment increased PICP more than GH did. Urinary excretion of calcium increased during GH treatment whereas no changes occurred during IGF-I treatment. The authors concluded that the differences between GH and IGF-I might be dose dependent, but could also indicate separate mechanisms of actions of the two peptides at the cellular level. This notion is supported by a recent study in short-term fasting women. Thus, in these subjects, IGF-I administration increased biochemical markers for bone formation but not for bone resorption (355). These data suggest a novel use of IGF-I to selectively stimulate bone formation in states of undernutrition and low bone turnover.

In cortical bone of rats, IGF-I treatment results in augmented subperiosteal bone formation, whereas both increased and decreased bone formation has been reported in the cancellous bone (356–358). In primates, however, GH but not IGF-I increased bone formation, as determined by mineral apposition rate (196), and it is not yet clear whether IGF-I promotes bone formation as determined by histomorphometry or bone mineral measurements.

In summary, both GH and IGF-I treatment increases bio-

chemical markers for both bone formation and bone resorption. GH treatment increases bone mass in GHD patients, but it is not yet clear whether IGF-I also has the capacity to increase bone mass in humans. *In vitro* data have demonstrated that GH exerts direct anabolic effects on osteoblasts (see Section III), and some of these direct effects of GH may not be achieved by a systemic IGF-I treatment. Future clinical studies will clarify whether IGF-I treatment is as efficient as GH in increasing bone mass.

## VI. Summary and Conclusions

It is well known that GH is important in the regulation of longitudinal bone growth. Its role in the regulation of bone metabolism in man has not been understood until recently. Several *in vivo* and *in vitro* studies have demonstrated that GH is important in the regulation of both bone formation and bone resorption. In Figure 9 a simplified model for the cellular effects of GH in the regulation of bone remodeling is presented (Fig. 9). GH increases bone formation in two ways: via a direct interaction with GHRs on osteoblasts and via an induction of endocrine and autocrine/paracrine IGF-I. It is difficult to say how much of the GH effect is mediated by IGFs and how much is IGF-independent. GH treatment also results in increased bone resorption. It is still unknown whether osteoclasts express functional GHRs, but recent *in vitro* studies indicate that GH regulates osteoclast formation in bone marrow cultures. Possible modulations of the GH/IGF axis by glucocorticoids and estrogens are also included in Fig. 9.

GH deficiency results in a decreased bone mass in both man and experimental animals. Long-term treatment (>18 months) of GHD patients with GH results in an increased bone mass. GH treatment also increases bone mass and the total mechanical strength of bones in rats with a normal GH secretion. Recent clinical studies demonstrate that GH treatment of patients with normal GH secretion increases biochemical markers for both bone formation and bone resorption. Because of the short duration of GH treatment in man with normal GH secretion, the effect on bone mass is still inconclusive.

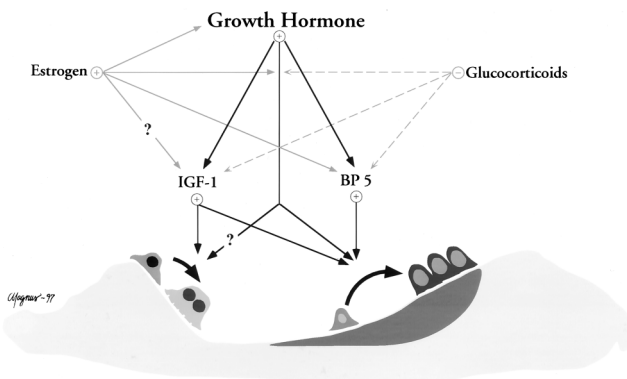

FIG. 9. The authors' proposed mechanism of action at the cellular level for GH in regulation of bone remodeling. The left part of the figure represents osteoclast-mediated bone resorption, while the right part represents osteoblast-mediated bone formation. ? indicates that both stimulatory and inhibitory effects have been shown.

Interestingly, GH treatment to GHD adults initially results in increased bone resorption with an increased number of bone-remodeling units and more newly produced unmineralized bone, resulting in an apparent low or unchanged bone mass. However, GH treatment for more than 18 months gives increased bone formation and bone mineralization of newly produced bone and a concomitant increase in bone mass as determined with DEXA. Thus, the action of GH on bone metabolism in GHD adults is 2-fold: it stimulates both bone resorption and bone formation. We therefore propose "the biphasic model" of GH action in bone remodeling (Fig. 10). According to this model, GH initially increases bone resorption with a concomitant bone loss that is followed by a phase of increased bone formation. After the moment when bone formation is stimulated more than bone resorption (transition point), bone mass is increased. However, a net gain of bone mass caused by GH may take some time as the initial decrease in bone mass must first be replaced (Fig. 10). When all clinical studies of GH treatment of GHD adults are taken into account, it appears that the "transition point" occurs after approximately 6 months and that a net increase of bone mass will be seen after 12–18 months of GH treatment. It should be emphasized that the biphasic model of GH action in bone remodeling is based on findings in GHD adults. It remains to be clarified whether or not it is valid for subjects with normal GH secretion.

A treatment intended to increase the effects of the GH/IGF-I axis on bone metabolism might include: 1) GH, 2) IGF, 3) other hormones/factors increasing the local IGF-I production in bone, and 4) GH-releasing factors. Other hormones/growth factors increasing local IGF may be important but are not discussed in this article. IGF-I has been shown to increase bone mass in animal models and biochemical bone markers in humans. However, no effect on bone mass has yet been presented in humans. Because the financial costs for GH treatment is high it has been suggested that GH-releasing factors might be used to stimulate the GH/IGF-I axis. The advantage of GH-releasing factors over GH is that some of them can be administered orally and that they may induce a more physiological GH secretion. Clinical

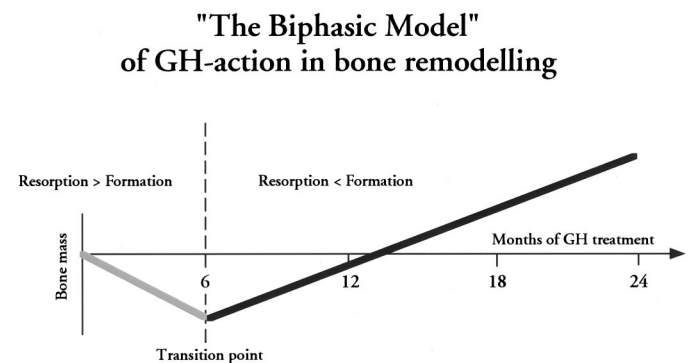

FIG. 10. The biphasic model of GH action in bone remodeling. According to this model, GH results initially in an increased bone resorption with a concomitant bone loss followed by a later increased bone formation. After the moment when bone formation is stimulated more than bone resorption (transition point), bone mass is increased. However, a net gain of bone mass of GH may take some time as the initial decrease in bone mass must first be replaced.

studies and initial experimental studies in dogs have demonstrated that GH-releasing factors increase GH secretion and regulate biochemical bone markers (Ref. 359 and our unpublished results).

We conclude that GH treatment increases bone mass in GHD adults, and future clinical studies will determine whether some patients with decreased bone mass of other origins will benefit from treatment with GH alone or in combination with other treatments.

### Acknowledgments

The authors thank Dr. Magnus Johnsson for artistic help with Figs. 1, 9, and 10 and Professor S. Mohan (Department of Veteran Affairs, Jerry L. Pettis Memorial VA Medical Center, Loma Linda, CA) for reading the manuscript and giving valuable suggestions for its improvement.

### References

1. Florini JR, Ewton DZ, Coolican SA 1996 Growth hormone and the insulin-like growth factor system in myogenesis. *Endocr Rev* 17: 481–517
2. Feld S, Hirschberg R 1996 Growth hormone, the insulin-like growth factor system, and the kidney. *Endocr Rev* 17:423–480
3. Bouillon R 1991 Growth hormone and bone. *Horm Res* 36:49–55
4. Sloatweg MC 1993 Growth hormone and bone. *Horm Metab Res* 25:335–343
5. Wuster C 1993 Growth hormone and bone metabolism. *Acta Endocrinol (Copenh)* 128:14–18
6. Eriksen EF, Kassem M, Brixen K 1993 Growth hormone and insulin-like growth factors as anabolic therapies for osteoporosis. *Horm Res* 40:95–98
7. Eriksen EF, Kassem M, Langdahl B 1996 Growth hormone, insulin-like growth factors and bone remodelling. *Eur J Clin Invest* 26:525–534
8. Harris WH, Heaney RP 1969 Effect of growth hormone on skeletal mass in adult dogs. *Nature* 223:403–404
9. Cheek D, Hill D 1974 Effect of growth hormone on cell and somatic growth. In: Knobil E, Sawyer W (eds) *Handbook of Physiology. American Physiological Society, Washington DC*, pp 159–185
10. Isaksson OG, Lindahl A, Nilsson A, Isgaard J 1987 Mechanism of the stimulatory effect of growth hormone on longitudinal bone growth. *Endocr Rev* 8:426–438
11. Kember NF 1971 Cell population kinetics of bone growth: the first ten years of autoradiographic studies with tritiated thymidine. *Clin Orthop* 76:213–230
12. Kember NF 1978 Cell kinetics and the control of growth in long bones. *Cell Tissue Kinet* 11:477–485
13. Kember NF 1971 Growth hormone and cartilage cell division in hypophysectomized rats. *Cell Tissue Kinet* 4:193–199
14. Kember NF, Walker KV 1971 Control of bone growth in rats. *Nature* 229:428–429
15. Daughaday WH, Rotwein P 1989 Insulin-like growth factors I and II. Peptide, messenger ribonucleic acid and gene structures, serum, and tissue concentrations. *Endocr Rev* 10:68–91
16. Daughaday WH, Hall K, Raben MS, Salmon Jr WD, Brande JL van den, Wyk JJ van 1972 Somatomedin: proposed designation for sulphation factor. *Nature* 235:107
17. Daughaday D 1981 Growth hormone and the somatomedins. In: Daughaday D (ed) *Endocrine Control of Growth*. Elsevier, New York, pp 1–24
18. Isaksson OG, Jansson JO, Gause IA 1982 Growth hormone stimulates longitudinal bone growth directly. *Science* 216:1237–1239
19. Barnard R, Ng KW, Martin TJ, Waters MJ 1991 Growth hormone (GH) receptors in clonal osteoblast-like cells mediate a mitogenic response to GH. *Endocrinology* 128:1459–1464
20. D'Ercole AJ, Stiles AD, Underwood LE 1984 Tissue concentrations of somatomedin C: further evidence for multiple sites of synthesis and paracrine or autocrine mechanisms of action. *Proc Natl Acad Sci USA* 81:935–939
21. Ernst M, Froesch ER 1988 Growth hormone dependent stimulation of osteoblast-like cells in serum-free cultures via local synthesis of insulin-like growth factor I. *Biochem Biophys Res Commun* 151: 142–147
22. Isgaard J, Nilsson A, Lindahl A, Jansson JO, Isaksson OG 1986 Effects of local administration of GH and IGF-1 on longitudinal bone growth in rats. *Am J Physiol* 250:E367–E372
23. Isgaard J, Nilsson A, Vikman K, Isaksson OG 1989 Growth hormone regulates the level of insulin-like growth factor-I mRNA in rat skeletal muscle. *J Endocrinol* 120:107–112
24. Kassem M, Blum W, Ristelli J, Mosekilde L, Eriksen EF 1993 Growth hormone stimulates proliferation and differentiation of normal human osteoblast-like cells *in vitro*. *Calcif Tissue Int* 52: 222–226
25. Lewinson D, Shenzer P, Hochberg Z 1993 Growth hormone involvement in the regulation of tartrate-resistant acid phosphatase-positive cells that are active in cartilage and bone resorption. *Calcif Tissue Int* 52:216–221
26. Maor G, Hochberg Z, Silbermann M 1989 Growth hormone stimulates the growth of mouse neonatal condylar cartilage *in vitro*. *Acta Endocrinol (Copenh)* 120:526–532
27. Maor G, Hochberg Z, von der Mark K, Heinegard D, Silbermann M 1989 Human growth hormone enhances chondrogenesis and osteogenesis in a tissue culture system of chondroprogenitor cells. *Endocrinology* 125:1239–1245
28. Nilsson A, Isgaard J, Lindahl A, Peterson L, Isaksson O 1987 Effects of unilateral arterial infusion of GH and IGF-I on tibial longitudinal bone growth in hypophysectomized rats. *Calcif Tissue Int* 40:91–96
29. Russell SM, Spencer EM 1985 Local injections of human or rat growth hormone or of purified human somatomedin-C stimulate unilateral tibial epiphyseal growth in hypophysectomized rats. *Endocrinology* 116:2563–2567
30. Schlechter NL, Russell SM, Greenberg S, Spencer EM, Nicoll CS 1986 A direct growth effect of growth hormone in rat hindlimb shown by arterial infusion. *Am J Physiol* 250:E231–E235
31. Schlechter NL, Russell SM, Spencer EM, Nicoll CS 1986 Evidence suggesting that the direct growth-promoting effect of growth hormone on cartilage *in vivo* is mediated by local production of somatomedin. *Proc Natl Acad Sci USA* 83:7932–7934
32. Sloatweg MC, van Buul-Offers SC, Herrmann-Erlee MP, Duursma SA 1988 Direct stimulatory effect of growth hormone on DNA synthesis of fetal chicken osteoblasts in culture. *Acta Endocrinol (Copenh)* 118:294–300
33. Stracke H, Schulz A, Moeller D, Rossol S, Schatz H 1984 Effect of growth hormone on osteoblasts and demonstration of somatomedin-C/IGF I in bone organ culture. *Acta Endocrinol (Copenh)* 107: 16–24
34. Vikman K, Carlsson B, Billig H, Eden S 1991 Expression and regulation of growth hormone (GH) receptor messenger ribonucleic acid (mRNA) in rat adipose tissue, adipocytes, and adipocyte precursor cells: GH regulation of GH receptor mRNA. *Endocrinology* 129:1155–1161
35. Green H, Morikawa M, Nixon T 1985 A dual effector theory of growth-hormone action. [Review]. *Differentiation* 29:195–198
36. Zezulak KM, Green H 1986 The generation of insulin-like growth factor-1-sensitive cells by growth hormone action. *Science* 233: 551–553
37. Isgaard J, Moller C, Isaksson OG, Nilsson A, Mathews LS, Norstedt G 1988 Regulation of insulin-like growth factor messenger ribonucleic acid in rat growth plate by growth hormone. *Endocrinology* 122:1515–1520
38. Lindahl A, Isgaard J, Nilsson A, Isaksson OG 1986 Growth hormone potentiates colony formation of epiphyseal chondrocytes in suspension culture. *Endocrinology* 118:1843–1848
39. Lindahl A, Nilsson A, Isaksson OG 1987 Effects of growth hormone and insulin-like growth factor-I on colony formation of rabbit epiphyseal chondrocytes at different stages of maturation. *J Endocrinol* 115:263–271
40. Lindahl A, Isgaard J, Carlsson L, Isaksson OG 1987 Differential effects of growth hormone and insulin-like growth factor I on



- colony formation of epiphyseal chondrocytes in suspension culture in rats of different ages. *Endocrinology* 121:1061–1069
41. Lindahl A, Isgaard J, Isaksson OG 1987 Growth hormone *in vivo* potentiates the stimulatory effect of insulin-like growth factor-1 *in vitro* on colony formation of epiphyseal chondrocytes isolated from hypophysectomized rats. *Endocrinology* 121:1070–1075
  42. Ohlsson C, Isaksson O, Lindahl A 1994 Clonal analysis of rat tibia growth plate chondrocytes in suspension culture—differential effects of growth hormone and insulin-like growth factor I. *Growth Regul* 4:1–7
  43. Ohlsson C, Nilsson A, Isaksson O, Lindahl A 1992 Growth hormone induces multiplication of the slowly cycling germinal cells of the rat tibial growth plate. *Proc Natl Acad Sci USA* 89:9826–9830
  44. Hunziker EB, Wagner J, Zapf J 1994 Differential effects of insulin-like growth factor I and growth hormone on developmental stages of rat growth plate chondrocytes *in vivo*. *J Clin Invest* 93:1078–1086
  45. Clark R, Carlsson L, Mortensen D, Cronin M 1994 Additive effects on body growth of insulin-like growth factor-1 and growth hormone in hypophysectomized rats. *Endocrinol Metab* 1:49–54
  46. Guler HP, Zapf J, Scheiwiller E, Froesch ER 1988 Recombinant human insulin-like growth factor I stimulates growth and has distinct effects on organ size in hypophysectomized rats. *Proc Natl Acad Sci USA* 85:4889–4893
  47. Holder AT, Spencer EM, Preece MA 1981 Effect of bovine growth hormone and a partially pure preparation of somatomedin on various growth parameters in hypopituitary dwarf mice. *J Endocrinol* 89:275–282
  48. Kupfer SR, Underwood LE, Baxter RC, Clemmons DR 1993 Enhancement of the anabolic effects of growth hormone and insulin-like growth factor I by use of both agents simultaneously. *J Clin Invest* 91:391–396
  49. Laron Z, Anin S, Klipper-Aurbach Y, Klinger B 1992 Effects of insulin-like growth factor on linear growth, head circumference, and body fat in patients with Laron-type dwarfism. *Lancet* 339:1258–1261
  50. Laron Z, Klinger B 1994 IGF-I treatment of adult patients with Laron syndrome: preliminary results. *Clin Endocrinol (Oxf)* 41:631–638
  51. Ranke M, Savage M, Chatelain P, Preece M, Rosenfeld R, Blum W, Wilton P 1995 Insulin-like growth factor I improves height in growth hormone insensitivity: two years' result. *Horm Res* 44:253–264
  52. Van den Brande JL, van Buul-Offers S 1979 Effect of growth hormone and peptide fractions containing somatomedin activity on growth and cartilage metabolism of Snell dwarf mice. *Acta Endocrinol (Copenh)* 92:242–257
  53. Walker JL, Ginalska-Malinowska M, Romer TE, Pucilowska JB, Underwood LE 1991 Effects of the infusion of insulin-like growth factor I in a child with growth hormone insensitivity syndrome (Laron dwarfism). *N Engl J Med* 324:1483–1488
  54. Walker JL, Van Wyk JJ, Underwood LE 1992 Stimulation of statural growth by recombinant insulin-like growth factor I in a child with growth hormone insensitivity syndrome (Laron type) [see comments]. *J Pediatr* 121:641–646
  55. Baker J, Liu JP, Robertson EJ, Efstratiadis A 1993 Role of insulin-like growth factors in embryonic and postnatal growth. *Cell* 75:73–82
  56. LeRoith D 1996 Insulin-like growth factors and binding proteins. *Baillieres Clin Endocrinol Metab* 10:49–73
  57. Liu JP, Baker J, Perkins AS, Robertson EJ, Efstratiadis A 1993 Mice carrying null mutations of the genes encoding insulin-like growth factor I (Igf-1) and type 1 IGF receptor (Igf1r). *Cell* 75:59–72
  58. Powell-Braxton L, Hollingshead P, Warburton C, Dowd M, Pitts-Meek S, Dalton D, Gillett N, Stewart TA 1993 IGF-I is required for normal embryonic growth in mice. *Genes Dev* 7:2609–2617
  59. Woods K, Camacho-Hubner C, Savage M, Clark A 1996 Intrauterine growth retardation and postnatal growth failure associated with deletion of the insulin-like growth factor gene. *N Engl J Med* 335:1363–1367
  60. Clark R, Mortensen D, Carlsson L 1995 Insulin-like growth factor-1 and growth hormone (GH) have distinct and overlapping effects in GH-deficient rats. *Endocrine* 3:297–304
  61. Behringer RR, Lewin TM, Quaife CJ, Palmiter RD, Brinster RL, D'Ercole AJ 1990 Expression of insulin-like growth factor I stimulates normal somatic growth in growth hormone-deficient transgenic mice. *Endocrinology* 127:1033–1040
  62. Mathews LS, Hammer RE, Behringer RR, D'Ercole AJ, Bell GI, Brinster RL, Palmiter RD 1988 Growth enhancement of transgenic mice expressing human insulin-like growth factor I. *Endocrinology* 123:2827–2833
  63. Fielder P, Mortensen D, Mallet P, Carlsson B, Baxter R, Clark R 1996 Differential long-term effects of insulin-like growth factor-I (IGF-I), growth hormone (GH), and IGF-I plus GH on body growth and IGF binding proteins in hypophysectomized rats. *Endocrinology* 137:1913–1920
  64. Hazel SJ, Gillespie CM, Moore RJ, Clark RG, Jureidini KF, Martin AA 1994 Enhanced body growth in uremic rats treated with IGF-I and growth hormone in combination. *Kidney Int* 46:58–68
  65. Palmiter RD, Brinster RL, Hammer RE, Trumbauer ME, Rosenfeld MG, Birnberg NC, Evans RM 1982 Dramatic growth of mice that develop from eggs microinjected with metallothionein-growth hormone fusion genes. *Nature* 300:611–615
  66. Behringer RR, Mathews LS, Palmiter RD, Brinster RL 1988 Dwarf mice produced by genetic ablation of growth hormone-expressing cells. *Genes Dev* 2:453–461
  67. Ohlsson C, Isgaard J, Tornell J, Nilsson A, Isaksson OG, Lindahl A 1993 Endocrine regulation of longitudinal bone growth. *Acta Paediatr Suppl* 82:[Suppl 391]:33–40
  68. Backeljauw PF, Underwood LE 1996 Prolonged treatment with recombinant insulin-like growth factor-I in children with growth hormone insensitivity syndrome—a clinical research center study. GHIS Collaborative Group. *J Clin Endocrinol Metab* 81:3312–3317
  69. Guevara-Aguirre J, Vasquez O, Martinez V, Martinez AL, Rosenbloom AL, Diamond Jr FB, Gargosky SE, Nonoshita L, Rosenfeld RG 1995 A randomized, double blind, placebo-controlled trial on safety and efficacy of recombinant human insulin-like growth factor-I in children with growth hormone receptor deficiency. *J Clin Endocrinol Metab* 80:1393–1398
  70. Klinger B, Laron Z 1995 Three year IGF-I treatment of children with Laron syndrome. *J Pediatr Endocrinol Metab* 8:149–158
  71. Walker JL, Baxter RC, Young S, Pucilowska J, Clemmons DR, Underwood LE 1993 Effects of recombinant insulin-like growth factor I on IGF binding proteins and the acid-labile subunit in growth hormone insensitivity syndrome. *Growth Regul* 3:109–112
  72. Guevara-Aguirre J, Rosenbloom A, Vasquez O, Martinez V, Gargosky S, Allen L, Rosenfeld R 1997 Two-year treatment of growth hormone (GH) receptor deficiency with recombinant insulin-like growth factor I in 22 children: comparison of two dosage levels and to GH-treated GH deficiency. *J Clin Endocrinol Metab* 82:629–633
  73. Ernst M, Rodan GA 1990 Increased activity of insulin-like growth factor (IGF) in osteoblastic cells in the presence of growth hormone (GH): positive correlation with the presence of the GH-induced IGF-binding protein BP-3. *Endocrinology* 127:807–814
  74. Slootweg MC, van Buul-Offers SC, Herrmann-Erlee MP, van der Meer JM, Duursma SA 1988 Growth hormone is mitogenic for fetal mouse osteoblasts but not for undifferentiated bone cells. *J Endocrinol* 116:R11–R13
  75. Scheven BA, Hamilton NJ, Fakkeldij TM, Duursma SA 1991 Effects of recombinant human insulin-like growth factor I and II (IGF-I/-II) and growth hormone (GH) on the growth of normal adult human osteoblast-like cells and human osteogenic sarcoma cells. *Growth Regul* 1:160–167
  76. Kassem M, Brixen K, Mosekilde L, Eriksen EF 1994 Human marrow stromal osteoblast-like cells do not show reduced responsiveness to *in vitro* stimulation with growth hormone in patients with postmenopausal osteoporosis. *Calcif Tissue Int* 54:1–6
  77. Kassem M, Mosekilde L, Eriksen EF 1994 Growth hormone stimulates proliferation of normal human bone marrow stromal osteoblast precursor cells *in vitro*. *Growth Regul* 4:131–135
  78. Nilsson A, Swolin D, Enerback S, Ohlsson C 1995 Expression of functional growth hormone receptors in cultured human osteoblast-like cells. *J Clin Endocrinol Metab* 80:3483–3488
  79. Salles JP, De Vries CP, Netelenbos JC, Slootweg MC 1994 Dexamethasone increases and serum decreases growth hormone recep-

- tor binding to UMR-106.01 rat osteosarcoma cells. *Endocrinology* 134:1455-1459
80. **Morel G, Chavassieux P, Barenton B, Dubois PM, Meunier PJ, Boivin G** 1993 Evidence for a direct effect of growth hormone on osteoblasts. *Cell Tissue Res* 273:279-286
  81. **Saggese G, Federico G, Cinquanta L** 1993 *In vitro* effects of growth hormone and other hormones on chondrocytes and osteoblast-like cells. *Acta Paediatr Suppl* 82:54-59
  82. **Chenu C, Valentin-Opran A, Chavassieux P, Saez S, Meunier PJ, Delmas PD** 1990 Insulin like growth factor I hormonal regulation by growth hormone and by 1,25(OH)<sub>2</sub>D<sub>3</sub> and activity on human osteoblast-like cells in short-term cultures. *Bone* 11:81-86
  83. **Kanzaki S, Baxter RC, Knutsen R, Baylink DJ, Mohan S** 1995 Evidence that human bone cells in culture secrete insulin-like growth factor (IGF)-II and IGF binding protein-3 but not acid-labile subunit both under basal and regulated conditions. *J Bone Miner Res* 10:854-858
  84. **Slootweg MC, Hoogerbrugge CM, de Poorter TL, Duursma SA, van Buul-Offers SC** 1990 The presence of classical insulin-like growth factor (IGF) type-I and -II receptors on mouse osteoblasts: autocrine/paracrine growth effect of IGFs? *J Endocrinol* 125:271-277
  85. **Okazaki R, Conover CA, Harris SA, Spelsberg TC, Riggs BL** 1995 Normal human osteoblast-like cells consistently express genes for insulin-like growth factors I and II but transformed human osteoblast cell lines do not. *J Bone Miner Res* 10:788-795
  86. **Swolin D, Brantsing C, Matejka G, Ohlsson C** 1996 Cortisol decreases IGF-I mRNA levels in human osteoblast-like cells. *J Endocrinol* 149:397-403
  87. **Slootweg MC, van Buul-Offers SC, Hoogerbrugge CM, Herrmann-Erlee MP, van den Eijnden-van Raaij AJ, Duursma SA, van Zoelen EJ** 1990 Characterization of growth factor activity produced by fetal mouse osteoblasts. *J Endocrinol* 124:301-309
  88. **Canalis E, Centrella M, Burch W, McCarthy TL** 1989 Insulin-like growth factor I mediates selective anabolic effects of parathyroid hormone in bone cultures. *J Clin Invest* 83:60-65
  89. **Mohan S, Baylink DJ** 1991 Bone growth factors. *Clin Orthop* 263:30-48
  90. **Wong GL, Kotliar D, Schlaeger D, Brandes SJ** 1990 IGF-I production by mouse osteoblasts. *J Bone Miner Res* 5:133-140
  91. **Okazaki R, Durham SK, Riggs BL, Conover CA** 1995 Transforming growth factor-beta and forskolin increase all classes of insulin-like growth factor-I transcripts in normal human osteoblast-like cells. *Biochem Biophys Res Commun* 207:963-970
  92. **Strom P, Ljunghall S, Melhus H** 1994 Adult human osteoblast-like cells do not express insulin-like growth factor-I. *Biochem Biophys Res Commun* 199:78-82
  93. **Middleton J, Arnott N, Walsh S, Beresford J** 1995 Osteoblasts and osteoclasts in adult human osteophyte tissue express the mRNAs for insulin-like growth factors I and II and the type 1 IGF receptor. *Bone* 16:287-293
  94. **Canalis E, Gabbitis B** 1994 Bone morphogenetic protein 2 increases insulin-like growth factor I and II transcripts and polypeptide levels in bone cell cultures. *J Bone Miner Res* 9:1999-2005
  95. **Delany AM, Canalis E** 1995 Transcriptional repression of insulin-like growth factor I by glucocorticoids in rat bone cells. *Endocrinology* 136:4776-4781
  96. **McCarthy TL, Casinghino S, Centrella M, Canalis E** 1994 Complex pattern of insulin-like growth factor binding protein expression in primary rat osteoblast enriched cultures: regulation by prostaglandin E<sub>2</sub>, growth hormone, and the insulin-like growth factors. *J Cell Physiol* 160:163-175
  97. **McCarthy TL, Centrella M, Canalis E** 1989 Parathyroid hormone enhances the transcript and polypeptide levels of insulin-like growth factor I in osteoblast-enriched cultures from fetal rat bone. *Endocrinology* 124:1247-1253
  98. **McCarthy TL, Centrella M, Canalis E** 1990 Cortisol inhibits the synthesis of insulin-like growth factor-I in skeletal cells. *Endocrinology* 126:1569-1575
  99. **McCarthy TL, Centrella M, Raisz LG, Canalis E** 1991 Prostaglandin E<sub>2</sub> stimulates insulin-like growth factor I synthesis in osteoblast-enriched cultures from fetal rat bone. *Endocrinology* 128:2895-2900
  100. **Pash JM, Delany AM, Adamo ML, Roberts Jr CT, LeRoith D, Canalis E** 1995 Regulation of insulin-like growth factor I transcription by prostaglandin E<sub>2</sub> in osteoblast cells. *Endocrinology* 136:33-38
  101. **Ernst M, Heath JK, Rodan GA** 1989 Estradiol effects on proliferation, messenger ribonucleic acid for collagen and insulin-like growth factor-I, and parathyroid hormone-stimulated adenylate cyclase activity in osteoblastic cells from calvariae and long bones. *Endocrinology* 125:825-833
  102. **Ernst M, Rodan GA** 1991 Estradiol regulation of insulin-like growth factor-I expression in osteoblastic cells: evidence for transcriptional control. *Mol Endocrinol* 5:1081-1089
  103. **Hayden JM, Mohan S, Baylink DJ** 1995 The insulin-like growth factor system and the coupling of formation to resorption. *Bone* 17:93S-98S
  104. **Blum WF, Ranke MB, Kietzmann K, Gauggel E, Zeisel HJ, Bierich JR** 1990 A specific radioimmunoassay for the growth hormone (GH)-dependent somatomedin-binding protein: its use for diagnosis of GH deficiency. *J Clin Endocrinol Metab* 70:1292-1298
  105. **Taaffe DR, Pruitt L, Reim J, Hintz RL, Butterfield G, Hoffman AR, Marcus R** 1994 Effect of recombinant human growth hormone on the muscle strength response to resistance exercise in elderly men. *J Clin Endocrinol Metab* 79:1361-1366
  106. **Mandel S, Moreland E, Nichols V, Hanna C, Lafranchi S** 1995 Changes in insulin-like growth factor-I (IGF-I), IGF-binding protein-3, growth hormone (GH)-binding protein, erythrocyte IGF-I receptors, and growth rate during GH treatment. *J Clin Endocrinol Metab* 80:190-194
  107. **Holloway L, Butterfield G, Hintz RL, Gesundheit N, Marcus R** 1994 Effects of recombinant human growth hormone on metabolic indices, body composition, and bone turnover in healthy elderly women. *J Clin Endocrinol Metab* 79:470-479
  108. **Mohan S, Baylink DJ, Pettis JL** 1996 Insulin-like growth factor (IGF)-binding proteins in serum-do they have additional roles besides modulating the endocrine IGF actions? *J Clin Endocrinol Metab* 81:3817-3820
  109. **Ono T, Kanzaki S, Seino Y, Baylink DJ, Mohan S** 1996 Growth hormone (GH) treatment of GH-deficient children increases serum levels of insulin-like growth factors (IGFs), IGF-binding protein-3 and -5, and bone alkaline phosphatase isoenzyme. *J Clin Endocrinol Metab* 81:2111-2116
  110. **Bagi CM, DeLeon E, Brommage R, Adams S, Rosen D, Sommer A** 1995 Systemic administration of rhIGF-I or rhIGF-I/IGFBP-3 increases cortical bone and lean body mass in ovariectomized rats. *Bone* 16:263S-269S
  111. **Schmid C, Ernst M, Zapf J, Froesch ER** 1989 Release of insulin-like growth factor carrier proteins by osteoblasts: stimulation by estradiol and growth hormone. *Biochem Biophys Res Commun* 160:788-794
  112. **Schmid C, Schlapfer I, Peter M, Boni-Schnetzler M, Schwander J, Zapf J, Froesch ER** 1994 Growth hormone and parathyroid hormone stimulate IGFBP-3 in rat osteoblasts. *Am J Physiol* 267:E226-E233
  113. **Mohan S, Strong DD, Lempert UG, Tremolieres F, Wergedal JE, Baylink DJ** 1992 Studies on regulation of insulin-like growth factor binding protein (IGFBP)-3 and IGFBP-4 production in human bone cells. *Acta Endocrinol (Copenh)* 127:555-564
  114. **Mohan S, Bautista CM, Wergedal J, Baylink DJ** 1989 Isolation of an inhibitory insulin-like growth factor (IGF) binding protein from bone cell-conditioned medium: a potential local regulator of IGF action. *Proc Natl Acad Sci USA* 86:8338-8342
  115. **Bautista CM, Baylink DJ, Mohan S** 1991 Isolation of a novel insulin-like growth factor (IGF) binding protein from human bone: a potential candidate for fixing IGF-II in human bone. *Biochem Biophys Res Commun* 176:756-763
  116. **Andress DL, Birnbaum RS** 1992 Human osteoblast-derived insulin-like growth factor (IGF) binding protein-5 stimulates osteoblast mitogenesis and potentiates IGF action. *J Biol Chem* 267:22467-22472
  117. **Mohan S, Nakao Y, Honda Y, Landale E, Leser U, Dony C, Lang K, Baylink DJ** 1995 Studies on the mechanisms by which insulin-like growth factor (IGF) binding protein-4 (IGFBP-4) and IGFBP-5 modulate IGF actions in bone cells. *J Biol Chem* 270:20424-20431



118. **Chen TL, Liu F, Bates RL, Hintz RL** 1991 Further characterization of insulin-like-growth factor binding proteins in rat osteoblast-like cell cultures: modulation by 17 beta-estradiol and human growth hormone. *Endocrinology* 128:2489–2496
119. **Durham SK, Riggs BL, Conover CA** 1994 The insulin-like growth factor-binding protein-4 (IGFBP-4)-IGFBP-4 protease system in normal human osteoblast-like cells: regulation by transforming growth factor-beta. *J Clin Endocrinol Metab* 79:1752–1758
120. **Slootweg MC, van Genesen ST, Otte AP, Duursma SA, Kruijer W** 1990 Activation of mouse osteoblast growth hormone receptor: c-fos oncogene expression independent of phosphoinositide breakdown and cyclic AMP. *J Mol Endocrinol* 4:265–274
121. **Melhus H, Ljunghall S** 1996 Growth hormone and insulin-like growth factor-I do not activate identical genes in normal human osteoblasts. *Biochem Mol Biol Int* 38:425–428
122. **Slootweg MC, Salles JP, Ohlsson C, de Vries CP, Engelbregt MJ, Netelenbos JC** 1996 Growth hormone binds to a single high affinity receptor site on mouse osteoblasts: modulation by retinoic acid and cell differentiation. *J Endocrinol* 150:465–472
123. **Slootweg MC, Ohlsson C, Salles JP, de Vries CP, Netelenbos JC** 1995 Insulin-like growth factor binding proteins-2 and -3 stimulate growth hormone receptor binding and mitogenesis in rat osteosarcoma cells. *Endocrinology* 136:4210–4217
124. **Slootweg M, Ohlsson C, van Elk E, Netelenbos J, Andress D** 1996 Growth hormone receptor activity is stimulated by insulin-like growth factor binding protein 5 in rat osteosarcoma cells. *Growth Regul* 6:238–246
125. **Leung K, Rajkovic IA, Peters E, Markus I, Van Wyk JJ, Ho KK** 1996 Insulin-like growth factor I and insulin down-regulate growth hormone (GH) receptors in rat osteoblasts: evidence for a peripheral feedback loop regulating GH action. *Endocrinology* 137:2694–2702
126. **Ohlsson C, Lovstedt K, Holmes PV, Nilsson A, Carlsson L, Tornell J** 1993 Embryonic stem cells express growth hormone receptors: regulation by retinoic acid. *Endocrinology* 133:2897–2903
127. **Slootweg M, Swolin D, Netelenbos J, Isaksson O, Ohlsson C** 1997 Estrogen enhances growth hormone receptor expression and growth hormone action in rat osteosarcoma cells and human osteoblast-like cells. *J Endocrinol* 155:159–164
128. **Swolin D, Nilsson A, Ohlsson C** 1998 Cortisol increases growth hormone receptor expression in human osteoblast-like cells. *J Endocrinol* 156:99–105
129. **Kelly PA, Ali S, Rozakis M, Goujon L, Nagano M, Pellegrini I, Gould D, Djiane J, Edery M, Finidori J, et al.** 1993 The growth hormone/prolactin receptor family. *Recent Prog Horm Res* 48:123–164
130. **Argetsinger LS, Campbell GS, Yang X, Witthuhn BA, Silvenoinen O, Ihle JN, Carter-Su C** 1993 Identification of JAK2 as a growth hormone receptor-associated tyrosine kinase. *Cell* 74:237–244
131. **Carter-Su C, Argetsinger LS, Campbell GS, Wang X, Ihle J, Witthuhn B** 1994 The identification of JAK2 tyrosine kinase as a signaling molecule for growth hormone. *Proc Soc Exp Biol Med* 206:210–215
132. **Stred SE, Stubbart JR, Argetsinger LS, Smith WC, Shafer JA, Talamantes F, Carter-Su C** 1992 Stimulation by growth hormone (GH) of GH receptor-associated tyrosine kinase activity. *Endocrinology* 130:1626–1636
133. **Campbell GS, Meyer DJ, Raz R, Levy DE, Schwartz J, Carter-Su C** 1995 Activation of acute phase response factor (APRF)/Stat3 transcription factor by growth hormone. *J Biol Chem* 270:3974–3979
134. **Meyer DJ, Campbell GS, Cochran BH, Argetsinger LS, Lerner AC, Finbloom DS, Carter-Su C, Schwartz J** 1994 Growth hormone induces a DNA binding factor related to the interferon-stimulated 91-kDa transcription factor. *J Biol Chem* 269:4701–4704
135. **Gronowski AM, Zhong Z, Wen Z, Thomas MJ, Darnell Jr JE, Rotwein P** 1995 *In vivo* growth hormone treatment rapidly stimulates the tyrosine phosphorylation and activation of Stat3. *Mol Endocrinol* 9:171–177
136. **Moller C, Hansson A, Enberg B, Lobie PE, Norstedt G** 1992 Growth hormone (GH) induction of tyrosine phosphorylation and activation of mitogen-activated protein kinases in cells transfected with rat GH receptor cDNA. *J Biol Chem* 267:23403–23408
137. **Campbell GS, Pang L, Miyasaka T, Saitiel AR, Carter-Su C** 1992 Stimulation by growth hormone of MAP kinase activity in 3T3-F442A fibroblasts. *J Biol Chem* 267:6074–6080
138. **Souza SC, Frick GP, Yip R, Lobo RB, Tai LR, Goodman HM** 1994 Growth hormone stimulates tyrosine phosphorylation of insulin receptor substrate-1. *J Biol Chem* 269:30085–30088
139. **Argetsinger LS, Hsu GW, Myers Jr MG, Billestrup N, White MF, Carter-Su C** 1995 Growth hormone, interferon-gamma, and leukemia inhibitory factor promoted tyrosyl phosphorylation of insulin receptor substrate-1. *J Biol Chem* 270:14685–14692
140. **Argetsinger LS, Norstedt G, Billestrup N, White MF, Carter-Su C** 1996 Growth hormone, interferon-gamma, and leukemia inhibitory factor utilize insulin receptor substrate-2 in intracellular signaling. *J Biol Chem* 271:29415–29421
141. **Slootweg MC, de Groot RP, Herrmann-Erlee MP, Koornneef I, Kruijer W, Kramer YM** 1991 Growth hormone induces expression of c-jun and jun B oncogenes and employs a protein kinase C signal transduction pathway for the induction of c-fos oncogene expression. *J Mol Endocrinol* 6:179–188
142. **Salles JP, Netelenbos JC, Slootweg MC** 1996 Growth hormone induces tyrosine phosphorylation of annexin I in rat osteosarcoma cells. *Endocrinology* 137:4358–4362
143. **Raynal P, Pollard HB** 1994 Annexins: the problem of assessing the biological role for a gene family of multifunctional calcium- and phospholipid-binding proteins. *Biochim Biophys Acta* 1197:63–93
144. **Ransjö M, Lerner U, Ohlsson C** 1996 Growth hormone inhibits formation of osteoclast-like cells in mouse bone marrow cultures. *J Bone Miner Res* 11 [Suppl]:T394
145. **Nishiyama K, Sugimoto T, Kaji H, Kanatani M, Kobayashi T, Chihara K** 1996 Stimulatory effect of growth hormone on bone resorption and osteoclast differentiation. *Endocrinology* 137:35–41
146. **Slootweg MC, Most WW, van Beek E, Schot LP, Papapoulos SE, Lowik CW** 1992 Osteoclast formation together with interleukin-6 production in mouse long bones is increased by insulin-like growth factor-I. *J Endocrinol* 132:433–438
147. **Saggese G, Baroncelli GI, Federico G, Bertelloni S** 1995 Effects of growth hormone on phosphocalcium homeostasis and bone metabolism. *Horm Res* 44:55–63
148. **Swolin D, Ohlsson C** 1996 Growth hormone increases interleukin-6 produced by human osteoblast-like cells. *J Clin Endocrinol Metab* 81:4329–4333
149. **Mochizuki H, Hakeda Y, Wakatsuki N, Usui N, Akashi S, Sato T, Tanaka K, Kumegawa M** 1992 Insulin-like growth factor-I supports formation and activation of osteoclasts. *Endocrinology* 131:1075–1080
150. **Hill PA, Reynolds JJ, Meikle MC** 1995 Osteoblasts mediate insulin-like growth factor-I and -II stimulation of osteoclast formation and function. *Endocrinology* 136:124–131
151. **Fiorelli G, Formigli L, Zecchi Orlandini S, Gori F, Falchetti A, Morelli A, Tanini A, Benvenuti S, Brandi ML** 1996 Characterization and function of the receptor for IGF-I in human preosteoclastic cells. *Bone* 18:269–276
152. **Klindt J, Buonomo FC, Wise T, Yen JT** 1996 Endocrine and metabolite responses to porcine growth hormone administered by sustained release implant for different lengths of time in male pigs. *Endocrinology* 137:3689–3695
153. **Goff JP, Caperna TJ, Steele NC** 1990 Effects of growth hormone administration on vitamin D metabolism and vitamin D receptors in the pig. *Domest Anim Endocrinol* 7:425–433
154. **Lobie PE, Garcia-Aragon J, Wang BS, Baumbach WR, Waters MJ** 1992 Cellular localization of the growth hormone binding protein in the rat. *Endocrinology* 130:3057–3065
155. **Hedner E, Linde A, Nilsson A** 1996 Systemically and locally administered growth hormone stimulates bone healing in combination with osteopromotive membranes: an experimental study in rats. *J Bone Miner Res* 11:1952–1960
156. **Saban J, Schneider GB, Bolt D, King D** 1996 Erythroid-specific expression of human growth hormone affects bone morphology in transgenic mice. *Bone* 18:47–52
157. **Tseng KF, Bonadio JF, Stewart TA, Baker AR, Goldstein SA** 1996 Local expression of human growth hormone in bone results in



- impaired mechanical integrity in the skeletal tissue of transgenic mice. *J Orthop Res* 14:598–604
158. **Baker AR, Hollingshead PG, Pitts-Meek S, Hansen S, Taylor R, Stewart TA** 1992 Osteoblast-specific expression of growth hormone stimulates bone growth in transgenic mice. *Mol Cell Biol* 12:5541–5547
  159. **Hock JM, Fonseca J** 1990 Anabolic effect of human synthetic parathyroid hormone-(1–34) depends on growth hormone. *Endocrinology* 127:1804–1810
  160. **Chen MM, Yeh JK, Aloia JF** 1995 Effect of ovariectomy on cancellous bone in the hypophysectomized rat. *J Bone Miner Res* 10:1334–1342
  161. **Schmidt IU, Dobnig H, Turner RT** 1995 Intermittent parathyroid hormone treatment increases osteoblast number, steady state messenger ribonucleic acid levels for osteocalcin, and bone formation in tibial metaphysis of hypophysectomized female rats. *Endocrinology* 136:5127–5134
  162. **Yeh JK, Chen MM, Aloia JF** 1995 Skeletal alterations in hypophysectomized rats. I. A histomorphometric study on tibial cancellous bone. *Anat Rec* 241:505–512
  163. **Bikle DD, Harris J, Halloran BP, Currier PA, Tanner S, Morey-Holton E** 1995 The molecular response of bone to growth hormone during skeletal unloading: regional differences. *Endocrinology* 136:2099–2109
  164. **Halloran BP, Bikle DD, Harris J, Autry CP, Currier PA, Tanner S, Patterson-Buckendahl P, Morey-Holton E** 1995 Skeletal unloading induces selective resistance to the anabolic actions of growth hormone on bone. *J Bone Miner Res* 10:1168–1176
  165. **Schiltz PM, Ohta T, Glass D, Mohan S, Baylink DJ** 1992 Growth hormone stimulates cortical bone formation in immature hypophysectomized rats. *Endocr Res* 18:19–30
  166. **Charlton HM, Clark RG, Robinson IC, Goff AE, Cox BS, Bugnon C, Bloch BA** 1988 Growth hormone-deficient dwarfism in the rat: a new mutation. *J Endocrinol* 119:51–58
  167. **Bartlett JM, Charlton HM, Robinson IC, Nieschlag E** 1990 Pubertal development and testicular function in the male growth hormone-deficient rat. *J Endocrinol* 126:193–201
  168. **Gevers EF, Wit JM, Robinson IC** 1995 Effect of gonadectomy on growth and GH responsiveness in dwarf rats. *J Endocrinol* 145:69–79
  169. **Wright NM, Renault J, Hollis B, Bell NH, Key LL** 1995 Effect of growth hormone on bone: bone mineral density, trabecular bone volume, and alkaline phosphatase improve or are restored in the dwarf rat treated with growth hormone. *J Bone Miner Res* 10:127–131
  170. **Martinez DA, Orth MW, Carr KE, Vanderby Jr R, Vilas AC** 1996 Cortical bone growth and maturational changes in dwarf rats induced by recombinant human growth hormone. *Am J Physiol* 270:E51–E59
  171. **Kimmel D** 1991 Quantitative histologic changes in the proximal tibial growth cartilage of aged female rats. *Cells and Materials [Suppl 1]:11–18*
  172. **Baron R, Tross R, Vignery A** 1984 Evidence of sequential remodeling in rat trabecular bone: morphology, dynamic histomorphometry, and changes during skeletal maturation. *Anat Rec* 208:137–145
  173. **Erben RG** 1996 Trabecular and endocortical bone surfaces in the rat: modeling or remodeling? *Anat Rec* 246:39–46
  174. **Aspenberg P, Hansson LI, Thorngren KG** 1985 Modification of bone formation rate by growth hormone, melanocyte-stimulating hormone, and cortisone in the normal rat. *Acta Anat (Basel)* 121:84–88
  175. **Jorgensen PH, Bak B, Andreassen TT** 1991 Mechanical properties and biochemical composition of rat cortical femur and tibia after long-term treatment with biosynthetic human growth hormone. *Bone* 12:353–359
  176. **Andreassen TT, Jorgensen PH, Flyvbjerg A, Orskov H, Oxlund H** 1995 Growth hormone stimulates bone formation and strength of cortical bone in aged rats. *J Bone Miner Res* 10:1057–1067
  177. **Turner CH, Burr DB** 1993 Basic biomechanical measurements of bone: a tutorial. *Bone* 14:595–608
  178. **Andreassen TT, Melsen F, Oxlund H** 1996 The influence of growth hormone on cancellous and cortical bone of the vertebral body in aged rats. *J Bone Miner Res* 11:1094–1102
  179. **Ortoft G, Oxlund H** 1996 Qualitative alterations of cortical bone in female rats after long-term administration of growth hormone and glucocorticoid. *Bone* 18:581–590
  180. **Turner RT** 1995 Effects of short-term spaceflight and recombinant human growth hormone (rhGH) on bone growth in young rats. *Aviat Space Environ Med* 66:763–769
  181. **Yeh JK, Aloia JF, Chen M, Ling N, Koo HC, Millard WJ** 1994 Effect of growth hormone administration and treadmill exercise on serum and skeletal IGF-I in rats. *Am J Physiol* 266:E129–E135
  182. **Oxlund H, Ejersted C, Andreassen T** 1996 Growth hormone increases the collagen deposition rate of cancellous bone in old rats. *Bone [Suppl 3] 19:157S*
  183. **Aer J, Halme J, Kivirikko KI, Laitinen O** 1968 Action of growth hormone on the metabolism of collagen in the rat. *Biochem Pharmacol* 17:1173–1180
  184. **Pilegaard R, Oxlund H, Ortoft G, Andreassen T** 1997 Direct determination of bone resorption *in vivo*: growth hormone increases the excretion of <sup>3</sup>H-tetracycline from prelabelled rats. *Endocrinol Metab [Suppl A]4:37*
  185. **Ejersted C, Andreassen TT, Hauge EM, Melsen F, Oxlund H** 1995 Parathyroid hormone (1–34) increases vertebral bone mass, compressive strength, and quality in old rats. *Bone* 17:507–511
  186. **Ejersted C, Andreassen TT, Nilsson MH, Oxlund H** 1994 Human parathyroid hormone(1–34) increases bone formation and strength of cortical bone in aged rats. *Eur J Endocrinol* 130:201–207
  187. **Andreassen T, Oxlund H** 1996 Additive anabolic effects of growth hormone and parathyroid hormone on vertebral body cortical and cancellous bone in old ovariectomized rats. *J Bone Miner Res [Suppl 1]11:S457*
  188. **Wanke R, Wolf E, Hermanns W, Folger S, Buchmuller T, Brem G** 1992 The GH-transgenic mouse as an experimental model for growth research: clinical and pathological studies. *Horm Res* 37:74–87
  189. **Wolf E, Rapp K, Brem G** 1991 Expression of metallothionein-human growth hormone fusion genes in transgenic mice results in disproportionate skeletal gigantism. *Growth Dev Aging* 55:117–127
  190. **Wolf E, Rapp K, Wanke R, Hermanns W, Pirschner F, von Butler-Wemken I, Brem G** 1991 Growth characteristics of metallothionein-human growth hormone transgenic mice as compared to mice selected for high eight-week body weight and unselected controls. II. Skeleton. *Growth Dev Aging* 55:237–248
  191. **Sandstedt J, Ohlsson C, Norjavaara E, Nilsson J, Tornell J** 1994 Disproportional bone growth and reduced weight gain in gonadectomized male bovine growth hormone transgenic and normal mice. *Endocrinology* 135:2574–2580
  192. **Sandstedt J, Tornell J, Norjavaara E, Isaksson O, Ohlsson C** 1996 Intact testis function is a prerequisite for an optimal effect of elevated GH levels on vertebral bone weight in mice. *Endocrinol Metab [Suppl 1A]4:10*
  193. **Sandstedt J, Tornell J, Norjavaara E, Isaksson OG, Ohlsson C** 1996 Elevated levels of growth hormone increase bone mineral content in normal young mice, but not in ovariectomized mice. *Endocrinology* 137:3368–3374
  194. **Ohlsson C, Tornell J, Sandstedt J, Anderassen TT** 1996 Effect of increased growth hormone on mechanical strength of cortical bone in growth hormone-transgenic mice. *J Bone Miner Res [Suppl 1]11:S458*
  195. **Mann DR, Rudman CG, Akinbami MA, Gould KG** 1992 Preservation of bone mass in hypogonadal female monkeys with recombinant human growth hormone administration. *J Clin Endocrinol Metab* 74:1263–1269
  196. **Sass DA, Jerome CP, Bowman AR, Bennett-Cain A, Ginn TA, LeRoith D, Epstein S** 1997 Short-term effects of growth hormone and insulin-like growth factor I on cancellous bone formation in Rhesus Macaque monkeys. *J Clin Endocrinol Metab* 82:1202–1209
  197. **Kalu DN** 1984 Evaluation of the pathogenesis of skeletal changes in ovariectomized rats. *Endocrinology* 115:507–512
  198. **Wronski TJ, Dann LM, Horner SL** 1989 Time course of vertebral osteopenia in ovariectomized rats. *Bone* 10:295–301
  199. **Li M, Shen Y, Wronski TJ** 1997 Time course of femoral neck osteopenia in ovariectomized rats. *Bone* 20:55–61
  200. **Turner RT, Vandersteenhoven JJ, Bell NH** 1987 The effects of

- ovariectomy and 17 beta-estradiol on cortical bone histomorphometry in growing rats. *J Bone Miner Res* 2:115–122
201. **Danielsen CC, Flyvbjerg A** 1996 Insulin-like growth factor I as a predictor of cortical bone mass in a long-term study of ovariectomized and estrogen-treated rats. *Bone* 19:493–498
  202. **Danielsen CC, Mosekilde L, Svenstrup B** 1993 Cortical bone mass, composition, and mechanical properties in female rats in relation to age, long-term ovariectomy, and estrogen substitution. *Calcif Tissue Int* 52:26–33
  203. **Kalu DN** 1991 The ovariectomized rat model of postmenopausal bone loss. *Bone Miner* 15:175–191
  204. **Frost HM, Jee WS** 1992 On the rat model of human osteopenias and osteoporoses. *Bone Miner* 18:227–236
  205. **Sims NA, Morris HA, Moore RJ, Durbridge TC** 1996 Increased bone resorption precedes increased bone formation in the ovariectomized rat. *Calcif Tissue Int* 59:121–127
  206. **Nowak J, Nygaard H, Eschen C** 1995 Growth hormone and/or estradiol and gestagen as a treatment of osteoporosis in the aged ovariectomized rat. *J Bone Miner Res [Suppl 1]*10:S252
  207. **Noland K, Orhii P, Rutstein J, Kalu D** 1996 Effect of growth hormone therapy on cortical bone in aged ovariectomized rats. *J Bone Miner Res [Suppl 1]*11:S458
  208. **Orhii P, Noland K, Rutstein J, Kalu D** 1996 Effect of growth hormone therapy on cancellous bone in aged ovariectomized rats. *J Bone Miner Res [Suppl 1]*11:S458
  209. **Verhaeghe J, van Bree R, Van Herck E, Thomas H, Skottner A, Dequeker J, Mosekilde L, Einhorn TA, Bouillon R** 1996 Effects of recombinant human growth hormone and insulin-like growth factor-I, with or without 17 beta-estradiol, on bone and mineral homeostasis of aged ovariectomized rats. *J Bone Miner Res* 11:1723–1735
  210. **Eschen C, Andreassen TT** 1995 Growth hormone normalizes vertebral strength in ovariectomized rats. *Calcif Tissue Int* 57:392–396
  211. **Turner RT, Hannon KS, Greene VS, Bell NH** 1995 Prednisone inhibits formation of cortical bone in sham-operated and ovariectomized female rats. *Calcif Tissue Int* 56:311–315
  212. **Jee WS, Blackwood EL, Dockum NL, Haslam RK, Kincl FA** 1966 Bio-assay of responses of growing bones to cortisol. *Clin Orthop* 49:39–63
  213. **Jett S, Wu K, Duncan H, Frost HM** 1970 Adrenalcorticosteroid and salicylate actions on human and canine haversian bone formation and resorption. *Clin Orthop* 68:301–315
  214. **Quarles LD** 1992 Prednisone-induced osteopenia in beagles: variable effects mediated by differential suppression of bone formation. *Am J Physiol* 263:E136–E141
  215. **King CS, Weir EC, Gundberg CW, Fox J, Insogna KL** 1996 Effects of continuous glucocorticoid infusion on bone metabolism in the rat. *Calcif Tissue Int* 59:184–191
  216. **Ferretti JL, Vazquez SO, Delgado CJ, Capozza R, Cointy G** 1992 Biphasic dose-response curves of cortisol effects on rat diaphyseal bone biomechanics. *Calcif Tissue Int* 50:49–54
  217. **Ortoft G, Oxlund H** 1988 Reduced strength of rat cortical bone after glucocorticoid treatment. *Calcif Tissue Int* 43:376–382
  218. **Altman A, Hochberg Z, Silbermann M** 1992 Interactions between growth hormone and dexamethasone in skeletal growth and bone structure of the young mouse. *Calcif Tissue Int* 51:298–304
  219. **Sanchez CP, Goodman WG, Brandli D, Goldenhersh M, Murray C, Carlton E, Hahn T, Salusky IB** 1995 Skeletal response to recombinant human growth hormone (rhGH) in children treated with long-term corticosteroids. *J Bone Miner Res* 10:2–6
  220. **Kovacs G, Fine RN, Worgall S, Schaefer F, Hunziker EB, Skottner-Lindun A, Mehls O** 1991 Growth hormone prevents steroid-induced growth depression in health and uremia. *Kidney Int* 40:1032–1040
  221. **Ortoft G, Oxlund H, Jorgensen PH, Andreassen TT** 1992 Glucocorticoid treatment or food deprivation counteract the stimulating effect of growth hormone on rat cortical bone strength. *Acta Paediatr* 81:912–917
  222. **Joyce ME, Terek RM, Jingushi S, Bolander ME** 1990 Role of transforming growth factor-beta in fracture repair. *Ann NY Acad Sci* 593:107–123
  223. **Ashhurst D** 1992 Macromolecular synthesis and mechanical stability during fracture repair. In: Hall B (ed) *Fracture Repair and Regeneration*. CRC Press Inc, Boca Raton, FL, pp 61–121
  224. **Koskinen E** 1959 The repair of experimental fractures under the action of growth hormone, thyrotropin and cortisone. A tissue analytic, roentgenologic and autoradiographic study. *Ann Chir Gynaecol [Suppl]*90:1–48
  225. **Udupa K, Gupta L** 1965 The effect of growth hormone and thyroxin in healing of fractures. *Indian J Med Res* 53:623–628
  226. **Muhlbach R, Tarsoly E, Trzenschik K, Hirthe D** 1972 Effect of growth hormone on the metabolism of bones and the healing of fractures. *Acta Chir Acad Sci Hung* 13:51–63
  227. **Zilkens KW, Senk G, Bubbenzer J, Peters H** 1980 The influence of growth hormone in healing of fractures in rats (author's transl). *Unfallheilkunde* 83:446–449
  228. **Pak J, Donovan J, Meier S, Schmelng G** 1991 Effects of growth hormone and levodopa on fracture healing: a rat model. *J Orthop Res* 9:383
  229. **Bak B, Jorgensen PH, Andreassen TT** 1990 Dose response of growth hormone on fracture healing in the rat. *Acta Orthop Scand* 61:54–57
  230. **Bak B, Jorgensen PH, Andreassen TT** 1991 The stimulating effect of growth hormone on fracture healing is dependent on onset and duration of administration. *Clin Orthop* 264:295–301
  231. **Nielsen HM, Bak B, Jorgensen PH, Andreassen TT** 1991 Growth hormone promotes healing of tibial fractures in the rat. *Acta Orthop Scand* 62:244–247
  232. **Bak B, Andreassen TT** 1989 The effect of aging on fracture healing in the rat. *Calcif Tissue Int* 45:292–297
  233. **Bak B, Andreassen TT** 1991 The effect of growth hormone on fracture healing in old rats. *Bone* 12:151–154
  234. **Herold HZ, Hurvitz A, Tadmor A** 1971 The effect of growth hormone on the healing of experimental bone defects. *Acta Orthop Scand* 42:377–384
  235. **Northmore-Ball M, Wood M, Meggit B** 1980 A biomechanical study of the effects of growth hormone in experimental fracture healing. *J Bone Joint Surg [Br]* 62:391–396
  236. **Aspenberg P, Wang JS, Choong P, Thorngren KG** 1994 No effect of growth hormone on bone graft incorporation. Titanium chamber study in the normal rat. *Acta Orthop Scand* 65:456–461
  237. **Harris J, Bean DA, Banks HH** 1975 Effect of phosphate supplementation, thyrocalcitonin, and growth hormone on strength of fracture healing. *Surg Forum* 26:519–521
  238. **Wittbjer J, Aspenberg P, Thorngren KG** 1985 Composite grafts of demineralized compact bone and marrow under systemic biosynthetic growth hormone treatment. *Arch Orthop Trauma Surg* 104:233–237
  239. **Carpenter JE, Hipp JA, Gerhart TN, Rudman CG, Hayes WC, Trippel SB** 1992 Failure of growth hormone to alter the biomechanics of fracture-healing in a rabbit model. *J Bone Joint Surg [Am]* 74:359–367
  240. **Ehrnberg A, Brosjo O, Laftman P, Nilsson O, Stromberg L** 1993 Enhancement of bone formation in rabbits by recombinant human growth hormone. *Acta Orthop Scand* 64:562–566
  241. **Zadek R, Robinson R** 1961 The effect of growth hormone on experimental long-bone defects. *J Bone Joint Surg [Am]* 43:1261
  242. **Dubreuil P, Abribat T, Broxup B, Brazeau P** 1996 Long-term growth hormone-releasing factor administration on growth hormone, insulin-like growth factor-I concentrations, and bone healing in the Beagle. *Can J Vet Res* 60:7–13
  243. **Koskinen E** 1963 The effect of growth hormone and thyrotropin on human fracture healing. A clinical, quantitative radiographic and metabolic study. *Acta Orthop Scand [Suppl]*62:1–68
  244. **Koskinen E, Lindholm R, Nieminen R, Puranen J, Attila U** 1978 Human growth hormone in delayed union and non-union of fractures. *Int Orthop* 1:317–322
  245. **de la Piedra C, Larranaga J, Castro N, Horcajada C, Rapado A, Herrera Pombo JL, Carbo E** 1988 Correlation among plasma osteocalcin, growth hormone, and somatomedin C in acromegaly. *Calcif Tissue Int* 43:44–45
  246. **Ezzat S, Melmed S, Endres D, Eyre DR, Singer FR** 1993 Biochemical assessment of bone formation and resorption in acromegaly. *J Clin Endocrinol Metab* 76:1452–1457

247. Halse J, Gordeladze JO 1978 Urinary hydroxyproline excretion in acromegaly. *Acta Endocrinol (Copenh)* 89:483–491
248. Halse J, Gordeladze JO 1981 Total and non-dialyzable urinary hydroxyproline in acromegalics and control subjects. *Acta Endocrinol (Copenh)* 96:451–457
249. Halse J, Melsen F, Mosekilde L 1981 Iliac crest bone mass and remodelling in acromegaly. *Acta Endocrinol (Copenh)* 97:18–22
250. Hampel R, Rose HJ, Jahreis G, Krabbe S, Meng W, Hesse V 1990 Bone alkaline phosphatase as an activity parameter of acromegaly. *Dtsch Med Wochenschr* 115:363–366
251. Kotzmann H, Bernecker P, Hubsch P, Pietschmann P, Woloszczuk W, Svoboda T, Geyer G, Luger A 1993 Bone mineral density and parameters of bone metabolism in patients with acromegaly. *J Bone Miner Res* 8:459–465
252. Marazuela M, Astigarraga B, Tabuenca MJ, Estrada J, Marin F, Lucas T 1993 Serum bone Gla protein as a marker of bone turnover in acromegaly. *Calcif Tissue Int* 52:419–421
253. Bijlsma JW, Nortier JW, Duursma SA, Crougths RJ, Bosch R, Thijssen JH 1983 Changes in bone metabolism during treatment of acromegaly. *Acta Endocrinol (Copenh)* 104:153–159
254. Terzolo M, Piovesan A, Osella G, Pia A, Reimondo G, Pozzi C, Raucci C, Torta M, Paccotti P, Angeli A 1993 Serum levels of bone Gla protein (osteocalcin, BGP) and carboxyterminal propeptide of type I procollagen (PICP) in acromegaly: effects of long-term octreotide treatment. *Calcif Tissue Int* 52:188–191
255. Diamond T, Nery L, Posen S 1989 Spinal and peripheral bone mineral densities in acromegaly: the effects of excess growth hormone and hypogonadism. *Ann Intern Med* 111:567–573
256. Albright F, Reifenstein EC 1948 *The Parathyroid Glands and Metabolic Bone Disease*. Williams & Wilkins, Baltimore
257. Riggs BL, Randall RV, Wahner HW, Jowsey J, Kelly PJ, Singh M 1972 The nature of the metabolic bone disorder in acromegaly. *J Clin Endocrinol Metab* 34:911–918
258. Seeman E, Wahner HW, Offord KP, Kumar R, Johnson WJ, Riggs BL 1982 Differential effects of endocrine dysfunction on the axial and the appendicular skeleton. *J Clin Invest* 69:1302–1309
259. Ho PJ, Fig LM, Barkan AL, Shapiro B 1992 Bone mineral density of the axial skeleton in acromegaly. *J Nucl Med* 33:1608–1612
260. Roelfsema F, Sluys J van der, Smeenk D 1970 Quantitation of bone and bone turnover in biopsy specimens from the iliac crest in acromegaly. *J Endocrinol* 48:LXI
261. Aloia JF, Roginsky MS, Jowsey J, Dombrowski CS, Shukla KK, Cohn SH 1972 Skeletal metabolism and body composition in acromegaly. *J Clin Endocrinol Metab* 35:543–551
262. Hubsch P, Kotzmann H, Svoboda T, Kainberger FM, Bankier A, Seidl G 1993 Bone density of the lumbar spine and femur in acromegaly. *Radiologie* 33:457–461
263. Holmes SJ, Whitehouse RW, Swindell R, Economou G, Adams JE, Shalet SM 1995 Effect of growth hormone replacement on bone mass in adults with adult onset growth hormone deficiency. *Clin Endocrinol (Oxf)* 42:627–633
264. Sartorio A, Conti A, Monzani M, Morabito F, Faglia G 1993 Growth hormone treatment in adults with GH deficiency: effects on new biochemical markers of bone and collagen turnover. *J Endocrinol Invest* 16:893–898
265. Delmas PD, Chatelain P, Malaval L, Bonne G 1986 Serum bone GLA-protein in growth hormone deficient children. *J Bone Miner Res* 1:333–338
266. Nielsen HK, Jorgensen JO, Brixen K, Christiansen JS 1991 Serum osteocalcin and bone isoenzyme alkaline phosphatase in growth hormone-deficient patients: dose-response studies with biosynthetic human GH. *Calcif Tissue Int* 48:82–87
267. Nielsen HK, Jorgensen JO, Brixen K, Moller N, Charles P, Christiansen JS 1991 24-h profile of serum osteocalcin in growth hormone (GH) deficient patients with and without GH treatment. *Growth Regul* 1:153–159
268. Balducci R, Toscano V, Pasquino AM, Mangiantini A, Municchi G, Armenise P, Terracina S, Prossomariti G, Boscherini B 1995 Bone turnover and bone mineral density in young adult patients with panhypopituitarism before and after long-term growth hormone therapy. *Eur J Endocrinol* 132:42–46
269. Johansen JS, Pedersen SA, Jorgensen JO, Riis BJ, Christiansen C, Christiansen JS, Skakkebaek NE 1990 Effects of growth hormone (GH) on plasma bone Gla protein in GH-deficient adults. *J Clin Endocrinol Metab* 70:916–919
270. Schlemmer A, Johansen JS, Pedersen SA, Jorgensen JO, Hassager C, Christiansen C 1991 The effect of growth hormone (GH) therapy on urinary pyridinoline cross-links in GH-deficient adults. *Clin Endocrinol (Oxf)* 35:471–476
271. Ferrandez A, Zachmann M, Prader A, Illig R 1970 Isolated growth hormone deficiency in prepubertal children. Influence of human growth hormone on longitudinal growth, adipose tissue, bone mass and bone maturation. *Helv Paediatr Acta* 25:566–576
272. Shore RM, Chesney RW, Mazess RB, Rose PG, Bargman GJ 1980 Bone mineral status in growth hormone deficiency. *J Pediatr* 96:393–396
273. Kaufman JM, Taelman P, Vermeulen A, Vandeweghe M 1992 Bone mineral status in growth hormone-deficient males with isolated and multiple pituitary deficiencies of childhood onset. *J Clin Endocrinol Metab* 74:118–123
274. O'Halloran DJ, Tsatsoulis A, Whitehouse RW, Holmes SJ, Adams JE, Shalet SM 1993 Increased bone density after recombinant human growth hormone (GH) therapy in adults with isolated GH deficiency. *J Clin Endocrinol Metab* 76:1344–1348
275. de Boer H, Blok GJ, van Lingen A, Teule GJ, Lips P, van der Veen EA 1994 Consequences of childhood-onset growth hormone deficiency for adult bone mass. *J Bone Miner Res* 9:1319–1326
276. Nussey SS, Hyer SL, Brada M, Leiper AD, Pazianas M 1994 Bone mineralization after treatment of growth hormone deficiency in survivors of childhood malignancy. *Acta Paediatr Suppl* 399:9–14
277. Bravenboer N, Holzmann P, de Boer H, Blok GJ, Lips P 1996 Histomorphometric analysis of bone mass and bone metabolism in growth hormone deficient adult men. *Bone* 18:551–557
278. Sartorio A, Ortolani S, Conti A, Cherubini R, Galbiati E, Faglia G 1996 Effects of recombinant growth hormone (GH) treatment on bone mineral density and body composition in adults with childhood onset growth hormone deficiency. *J Endocrinol Invest* 19:524–529
279. Amato G, Izzo G, La Montagna G, Bellastella A 1996 Low dose recombinant human growth hormone normalizes bone metabolism and cortical bone density and improves trabecular bone density in growth hormone deficient adults without causing adverse effects. *Clin Endocrinol (Oxf)* 45:27–32
280. Hyer SL, Rodin DA, Tobias JH, Leiper A, Nussey SS 1992 Growth hormone deficiency during puberty reduces adult bone mineral density. *Arch Dis Child* 67:1472–1474
281. Finkelstein JS, Neer RM, Biller BM, Crawford JD, Klibanski A 1992 Osteopenia in men with a history of delayed puberty. *N Engl J Med* 326:600–604
282. Saggese G, Baroncelli GI, Bertelloni S, Barsanti S 1996 The effect of long-term growth hormone (GH) treatment on bone mineral density in children with GH deficiency. Role of GH in the attainment of peak bone mass. *J Clin Endocrinol Metab* 81:3077–3083
283. Wuster C, Slenczka E, Ziegler R 1991 Increased prevalence of osteoporosis and arteriosclerosis in conventionally substituted anterior pituitary insufficiency: need for additional growth hormone substitution? *Klin Wochenschr* 69:769–773
284. Johansson AG, Burman P, Westermark K, Ljunghall S 1992 The bone mineral density in acquired growth hormone deficiency correlates with circulating levels of insulin-like growth factor I. *J Intern Med* 232:447–452
285. Bing-You RG, Denis MC, Rosen CJ 1993 Low bone mineral density in adults with previous hypothalamic-pituitary tumors: correlations with serum growth hormone responses to GH-releasing hormone, insulin-like growth factor I, and IGF binding protein 3. *Calcif Tissue Int* 52:183–187
286. Rosen T, Hansson T, Granhed H, Szucs J, Bengtsson BA 1993 Reduced bone mineral content in adult patients with growth hormone deficiency. *Acta Endocrinol (Copenh)* 129:201–206
287. Holmes SJ, Economou G, Whitehouse RW, Adams JE, Shalet SM 1994 Reduced bone mineral density in patients with adult onset growth hormone deficiency. *J Clin Endocrinol Metab* 78:669–674
288. Beshyah SA, Freemantle C, Thomas E, Rutherford O, Page B, Murphy M, Johnston DG 1995 Abnormal body composition and reduced bone mass in growth hormone deficient hypopituitary adults. *Clin Endocrinol (Oxf)* 42:179–189



289. **Degerblad M, Bengtsson BA, Brammert M, Johnell O, Manhem P, Rosen T, Thoren M** 1995 Reduced bone mineral density in adults with growth hormone (GH) deficiency: increased bone turnover during 12 months of GH substitution therapy. *Eur J Endocrinol* 133:180–188
290. **Kaji H, Abe H, Fukase M, Chihara K** 1997 Normal bone mineral density in patients with adult onset GH deficiency. *Endocrinol Metab* 4:163–166
291. **Toogood AA, Adams JE, O'Neill PA, Shalet SM** 1997 Elderly patients with adult-onset growth hormone deficiency are not osteopenic. *J Clin Endocrinol Metab* 82:1462–1466
292. **Rosen T, Wilhelmsen L, Landin-Wilhelmsen K, Lappas G, Bengtsson BA** 1997 Increased fracture frequency in adult patients with hypopituitarism and GH deficiency. *Eur J Endocrinol* 137:240–245
293. **Ott SM** 1990 Attainment of peak bone mass. *J Clin Endocrinol Metab* 71:1082A–1082C
294. **Amato G, Carella C, Fazio S, La Montagna G, Cittadini A, Sabaatini D, Marciano-Mone C, Sacca L, Bellastella A** 1993 Body composition, bone metabolism, and heart structure and function in growth hormone (GH)-deficient adults before and after GH replacement therapy at low doses. *J Clin Endocrinol Metab* 77:1671–1676
295. **Baum HB, Biller BM, Finkelstein JS, Cannistraro KB, Oppenheim DS, Schoenfeld DA, Michel TH, Wittink H, Klibanski A** 1996 Effects of physiologic growth hormone therapy on bone density and body composition in patients with adult-onset growth hormone deficiency. A randomized, placebo-controlled trial. *Ann Intern Med* 125:883–890
296. **Bengtsson BA, Eden S, Lonn L, Kvist H, Stokland A, Lindstedt G, Bosaeus I, Toli J, Sjoström L, Isaksson OG** 1993 Treatment of adults with growth hormone (GH) deficiency with recombinant human GH. *J Clin Endocrinol Metab* 76:309–317
297. **Beshyah SA, Thomas E, Kyd P, Sharp P, Fairney A, Johnston DG** 1994 The effect of growth hormone replacement therapy in hypopituitary adults on calcium and bone metabolism. *Clin Endocrinol (Oxf)* 40:383–391
298. **Beshyah SA, Kyd P, Thomas E, Fairney A, Johnston DG** 1995 The effects of prolonged growth hormone replacement on bone metabolism and bone mineral density in hypopituitary adults. *Clin Endocrinol (Oxf)* 42:249–254
299. **Binnerts A, Swart GR, Wilson JH, Hoogerbrugge N, Pols HA, Birkenhager JC, Lamberts SW** 1992 The effect of growth hormone administration in growth hormone deficient adults on bone, protein, carbohydrate and lipid homeostasis, as well as on body composition. *Clin Endocrinol (Oxf)* 37:79–87
300. **Hansen TB, Brixen K, Vahl N, Jørgensen JO, Christiansen JS, Mosekilde L, Hagen C** 1996 Effects of 12 months of growth hormone (GH) treatment on calciotropic hormones, calcium homeostasis, and bone metabolism in adults with acquired GH deficiency: a double blind, randomized, placebo-controlled study. *J Clin Endocrinol Metab* 81:3352–3359
301. **Jensen LT, Jørgensen JO, Risteli J, Christiansen JS, Lorenzen I** 1991 Type I and III procollagen propeptides in growth hormone-deficient patients: effects of increasing doses of GH. *Acta Endocrinol (Copenh)* 124:278–282
302. **Johansson AG, Lindh E, Blum WF, Kollerup G, Sørensen OH, Ljunghall S** 1996 Effects of growth hormone and insulin-like growth factor I in men with idiopathic osteoporosis. *J Clin Endocrinol Metab* 81:44–48
303. **Johansen JS, Jensen SB, Riis BJ, Rasmussen L, Zachmann M, Christiansen C** 1990 Serum bone Gla protein: a potential marker of growth hormone (GH) deficiency and the response to GH therapy. *J Clin Endocrinol Metab* 71:122–126
304. **Johannsson G, Rosen T, Bosaeus I, Sjoström L, Bengtsson BA** 1996 Two years of growth hormone (GH) treatment increases bone mineral content and density in hypopituitary patients with adult-onset GH deficiency. *J Clin Endocrinol Metab* 81:2865–2873
305. **Juul A, Pedersen SA, Sørensen S, Winkler K, Jørgensen JO, Christiansen JS, Skakkebaek NE** 1994 Growth hormone (GH) treatment increases serum insulin-like growth factor binding protein-3, bone isoenzyme alkaline phosphatase and forearm bone mineral content in young adults with GH deficiency of childhood onset. *Eur J Endocrinol* 131:41–49
306. **Thoren M, Soop M, Degerblad M, Saaf M** 1993 Preliminary study of the effects of growth hormone substitution therapy on bone mineral density and serum osteocalcin levels in adults with growth hormone deficiency. *Acta Endocrinol (Copenh)* 128:41–43
307. **Vandeweghe M, Taelman P, Kaufman JM** 1993 Short and long-term effects of growth hormone treatment on bone turnover and bone mineral content in adult growth hormone-deficient males. *Clin Endocrinol (Oxf)* 39:409–415
308. **Whitehead HM, Boreham C, McIlrath EM, Sheridan B, Kennedy L, Atkinson AB, Hadden DR** 1992 Growth hormone treatment of adults with growth hormone deficiency: results of a 13-month placebo controlled cross-over study. *Clin Endocrinol (Oxf)* 36:45–52
309. **Wollmann HA, Schonau E, Blum WF, Meyer F, Kruse K, Ranke MB** 1995 Dose-dependent responses in insulin-like growth factors, insulin-like growth factor-binding protein-3 and parameters of bone metabolism to growth hormone therapy in young adults with growth hormone deficiency. *Horm Res* 43:249–256
310. **Bravenboer N, Holzmann P, de Boer H, Roos JC, van der Veen EA, Lips P** 1997 The effect of growth hormone (GH) on histomorphometric indices of bone structure and bone turnover in GH-deficient men. *J Clin Endocrinol Metab* 82:1818–1822
311. **Brixen K, Nielsen HK, Mosekilde L, Flyvbjerg A** 1990 A short course of recombinant human growth hormone treatment stimulates osteoblasts and activates bone remodeling in normal human volunteers. *J Bone Miner Res* 5:609–618
312. **Marcus R, Butterfield G, Holloway L, Gilliland L, Baylink DJ, Hintz RL, Sherman BM** 1990 Effects of short term administration of recombinant human growth hormone to elderly people. *J Clin Endocrinol Metab* 70:519–527
313. **Holmes S, Mawer E, Shalet S** 1997 Effect of growth hormone replacement on calcium, phosphate, vitamin D and parathyroid hormone metabolism in adults with growth hormone deficiency. *Endocrinol Metab* 4:49–54
314. **Spencer EM, Tobiassen O** 1981 The mechanism of the action of growth hormone on vitamin D metabolism in the rat. *Endocrinology* 108:1064–1070
315. **Spanos E, Barrett D, MacIntyre I, Pike JW, Safilian EF, Haussler MR** 1978 Effect of growth hormone on vitamin D metabolism. *Nature* 273:246–247
316. **Lieberman SA, Holloway L, Marcus R, Hoffman AR** 1994 Interactions of growth hormone and parathyroid hormone in renal phosphate, calcium, and calcitriol metabolism and bone remodeling in postmenopausal women. *J Bone Miner Res* 9:1723–1728
317. **Degerblad M, Elgindy N, Hall K, Sjöberg HE, Thoren M** 1992 Potent effect of recombinant growth hormone on bone mineral density and body composition in adults with panhypopituitarism. *Acta Endocrinol (Copenh)* 126:387–393
318. **Valk NK, Erdtsieck RJ, Algra D, Lamberts SW, Pols HA** 1995 Combined treatment of growth hormone and the bisphosphonate pamidronate, vs. treatment with GH alone, in GH-deficient adults: the effects on renal phosphate handling, bone turnover and bone mineral mass. *Clin Endocrinol (Oxf)* 43:317–324
319. **Holmes SJ, Whitehouse RW, Economou G, O'Halloran DJ, Adams JE, Shalet SM** 1995 Further increase in forearm cortical bone mineral content after discontinuation of growth hormone replacement. *Clin Endocrinol (Oxf)* 42:3–7
320. **Zadik Z, Chalew SA, McCarter Jr RJ, Meistas M, Kowarski AA** 1985 The influence of age on the 24-hour integrated concentration of growth hormone in normal individuals. *J Clin Endocrinol Metab* 60:513–516
321. **Corpas E, Harman SM, Blackman MR** 1993 Human growth hormone and human aging. *Endocr Rev* 14:20–39
322. **Landin-Wilhelmsen K, Wilhelmsen L, Lappas G, Rosen T, Lindstedt G, Lundberg PA, Bengtsson BA** 1994 Serum insulin-like growth factor I in a random population sample of men and women: relation to age, sex, smoking habits, coffee consumption and physical activity, blood pressure and concentrations of plasma lipids, fibrinogen, parathyroid hormone and. *Clin Endocrinol (Oxf)* 41:351–357
323. **Smith Jr RW** 1967 Dietary and hormonal factors in bone loss. *Fed Proc* 26:1737–1746

324. **Boonen S, Lesaffre E, Aerssens J, Pelemans W, Dequeker J, Bouillon R** 1996 Deficiency of the growth hormone-insulin-like growth factor-I axis potentially involved in age-related alterations in body composition. *Gerontology* 42:330–338
325. **Johansson AG, Forslund A, Hambraeus L, Blum WF, Ljunghall S** 1994 Growth hormone-dependent insulin-like growth factor binding protein is a major determinant of bone mineral density in healthy men. *J Bone Miner Res* 9:915–921
326. **Boonen S, Lesaffre E, Dequeker J, Aerssens J, Nijs J, Pelemans W, Bouillon R** 1996 Relationship between baseline insulin-like growth factor-I (IGF-I) and femoral bone density in women aged over 70 years: potential implications for the prevention of age-related bone loss. *J Am Geriatr Soc* 44:1301–1306
327. **Ljunghall S, Johansson AG, Burman P, Kampe O, Lindh E, Karlsson FA** 1992 Low plasma levels of insulin-like growth factor 1 (IGF-1) in male patients with idiopathic osteoporosis. *J Intern Med* 232:59–64
328. **Pun KK, Lau P, Wong FH, Cheng CL, Pun WK, Chow SP, Leong JC** 1990 25-Hydroxycholecalciferol and insulin-like growth factor I are determinants of serum concentration of osteocalcin in elderly subjects with and without spinal fractures. *Bone* 11:397–400
329. **Wuster C, Blum WF, Schlemilch S, Ranke MB, Ziegler R** 1993 Decreased serum levels of insulin-like growth factors and IGF binding protein 3 in osteoporosis. *J Intern Med* 234:249–255
330. **Nicolas V, Prewett A, Bettica P, Mohan S, Finkelman RD, Baylink DJ, Farley JR** 1994 Age-related decreases in insulin-like growth factor-I and transforming growth factor-beta in femoral cortical bone from both men and women: implications for bone loss with aging [see comments]. *J Clin Endocrinol Metab* 78:1011–1016
331. **Kassem M, Brixen K, Blum W, Mosekilde L, Eriksen EF** 1994 No evidence for reduced spontaneous or growth-hormone-stimulated serum levels of insulin-like growth factor (IGF)-I, IGF-II or IGF binding protein 3 in women with spinal osteoporosis. *Eur J Endocrinol* 131:150–155
332. **Bennett AE, Wahner HW, Riggs BL, Hintz RL** 1984 Insulin-like growth factors I and II: aging and bone density in women. *J Clin Endocrinol Metab* 59:701–704
333. **Brixen K, Kassem M, Nielsen HK, Loft AG, Flyvbjerg A, Mosekilde L** 1995 Short-term treatment with growth hormone stimulates osteoblastic and osteoclastic activity in osteopenic postmenopausal women: a dose response study. *J Bone Miner Res* 10:1865–1874
334. **Kassem M, Brixen K, Blum WF, Mosekilde L, Eriksen EF** 1994 Normal osteoclastic and osteoblastic responses to exogenous growth hormone in patients with postmenopausal spinal osteoporosis. *J Bone Miner Res* 9:1365–1370
335. **Kruse HP, Kuhlencordt F** 1975 On an attempt to treat primary and secondary osteoporosis with human growth hormone. *Horm Metab Res* 7:488–491
336. **Aloia JF, Zanzi I, Ellis K, Jowsey J, Roginsky M, Wallach S, Cohn SH** 1976 Effects of growth hormone in osteoporosis. *J Clin Endocrinol Metab* 43:992–999
337. **Aloia JF, Vaswani A, Kapoor A, Yeh JK, Cohn SH** 1985 Treatment of osteoporosis with calcitonin, with and without growth hormone. *Metabolism* 34:124–129
338. **Aloia JF, Vaswani A, Meunier PJ, Edouard CM, Arlot ME, Yeh JK, Cohn SH** 1987 Coherence treatment of postmenopausal osteoporosis with growth hormone and calcitonin. *Calcif Tissue Int* 40:253–259
339. **Erdtsieck RJ, Pols HA, Valk NK, van Ouwerkerk BM, Lamberts SW, Mulder P, Birkenhager JC** 1995 Treatment of postmenopausal osteoporosis with a combination of growth hormone and pamidronate: a placebo controlled trial. *Clin Endocrinol (Oxf)* 43:557–565
340. **Holloway L, Kohlmeier L, Kent K, Marcus R** 1997 Skeletal effects of cyclic recombinant human growth hormone and salmon calcitonin in osteopenic postmenopausal women. *J Clin Endocrinol Metab* 82:1111–1117
341. **Ho KK, O'Sullivan AJ, Weissberger AJ, Kelly JJ** 1996 Sex steroid regulation of growth hormone secretion and action. *Horm Res* 45:67–73
342. **Ho KK, Weissberger AJ** 1992 Impact of short-term estrogen administration on growth hormone secretion and action: distinct route-dependent effects on connective and bone tissue metabolism. *J Bone Miner Res* 7:821–827
343. **Friend KE, Hartman ML, Pezzoli SS, Clasey JL, Thorer MO** 1996 Both oral and transdermal estrogen increase growth hormone release in postmenopausal women—a clinical research center study. *J Clin Endocrinol Metab* 81:2250–2256
344. **Brown DM, Jowsey J, Bradford DS** 1974 Osteoporosis in ovarian dysgenesis. *J Pediatr* 84:816–820
345. **Shore RM, Chesney RW, Mazess RB, Rose PG, Bargman GJ** 1982 Skeletal demineralization in Turner's syndrome. *Calcif Tissue Int* 34:519–522
346. **Bergmann P, Valsamis J, Van Perborgh J, De Schepper J, Van Vliet G** 1990 Comparative study of the changes in insulin-like growth factor-I, procollagen-III N-terminal extension peptide, bone Gla-protein, and bone mineral content in children with Turner's syndrome treated with recombinant growth hormone. *J Clin Endocrinol Metab* 71:1461–1467
347. **Neely EK, Marcus R, Rosenfeld RG, Bachrach LK** 1993 Turner syndrome adolescents receiving growth hormone are not osteopenic. *J Clin Endocrinol Metab* 76:861–866
348. **Lanes R, Gunczler P, Paoli M, Weisinger JR** 1995 Bone mineral density of prepubertal age girls with Turner's syndrome while on growth hormone therapy. *Horm Res* 44:168–171
349. **Rudman D, Feller AG, Nagraj HS, Gergans GA, Lalitha PY, Goldberg AF, Schlenker RA, Cohn L, Rudman IW, Mattson DE** 1990 Effects of human growth hormone in men over 60 years old. *N Engl J Med* 323:1–6
350. **Canalis E** 1996 Clinical review 83: mechanisms of glucocorticoid action in bone: implications to glucocorticoid-induced osteoporosis. *J Clin Endocrinol Metab* 81:3441–3447
351. **Giustina A, Bussi AR, Jacobello C, Wehrenberg WB** 1995 Effects of recombinant human growth hormone (GH) on bone and intermediary metabolism in patients receiving chronic glucocorticoid treatment with suppressed endogenous GH response to GH-releasing hormone. *J Clin Endocrinol Metab* 80:122–129
352. **Johansson AG, Lindh E, Ljunghall S** 1992 Insulin-like growth factor I stimulates bone turnover in osteoporosis. *Lancet* 339:1619
353. **Ebeling PR, Jones JD, O'Fallon WM, Janes CH, Riggs BL** 1993 Short-term effects of recombinant human insulin-like growth factor I on bone turnover in normal women. *J Clin Endocrinol Metab* 77:1384–1387
354. **Ghiron LJ, Thompson JL, Holloway L, Hintz RL, Butterfield GE, Hoffman AR, Marcus R** 1995 Effects of recombinant insulin-like growth factor-I and growth hormone on bone turnover in elderly women. *J Bone Miner Res* 10:1844–1852
355. **Grinspoon SK, Baum HB, Peterson S, Klibanski A** 1995 Effects of rhIGF-I administration on bone turnover during short-term fasting. *J Clin Invest* 96:900–906
356. **Bagi CM, Brommage R, Deleon L, Adams S, Rosen D, Sommer A** 1994 Benefit of systemically administered rhIGF-I and rhIGF-I/IGFBP-3 on cancellous bone in ovariectomized rats. *J Bone Miner Res* 9:1301–1312
357. **Ibbotson KJ, Orcutt CM, D'Souza SM, Paddock CL, Arthur JA, Jankowsky ML, Boyce RW** 1992 Contrasting effects of parathyroid hormone and insulin-like growth factor I in an aged ovariectomized rat model of postmenopausal osteoporosis. *J Bone Miner Res* 7:425–432
358. **Tobias JH, Chow JW, Chambers TJ** 1992 Opposite effects of insulin-like growth factor-I on the formation of trabecular and cortical bone in adult female rats. *Endocrinology* 131:2387–2392
359. **Cella SG, Cerri CG, Daniel S, Sibilia V, Rigamonti A, Cattaneo L, Deghenghi R, Muller EE** 1996 Sixteen weeks of hexarelin therapy in aged dogs: effects on the somatotrophic axis, muscle morphology, and bone metabolism. *J Gerontol* 51:B439–B447
